1 **The Causal Effects of Education on Health, Mortality, Cognition, Well-being, and**  
2 **Income in the UK Biobank**

3  
4 **Short Title: The Effects of Education in UK Biobank**

5  
6 Neil M Davies,<sup>\*1,2</sup> Matt Dickson,<sup>3</sup> George Davey Smith,<sup>1,2</sup> Gerard van den Berg,<sup>1,4</sup> and  
7 Frank Windmeijer.<sup>1,4</sup>

8  
9 <sup>1</sup> Medical Research Council Integrative Epidemiology Unit, University of  
10 Bristol, BS8 2BN, United Kingdom.

11 <sup>2</sup> School of Social and Community Medicine, University of Bristol, Barley  
12 House, Oakfield Grove, Bristol, BS8 2BN, United Kingdom.

13 <sup>3</sup> Department of Social and Policy Sciences, University of Bath, United  
14 Kingdom.

15 <sup>4</sup> Department of Economics, University of Bristol, Priory Road Complex, Bristol BS8  
16 1TU, United Kingdom.

17 \* Corresponding author (email:[neil.davies@bristol.ac.uk](mailto:neil.davies@bristol.ac.uk), tel: +44 117 331 3417)

18  
19 Tables: 6

20 Figures: 6

21  
22 **Classification:** Social Sciences (Economic Sciences) and Biological Sciences  
23 (Genetics).

24  
25 **Key Words:** ROSLA, instrumental variable analysis, education, genomic  
26 confounding.

27  
28 **Funding:** The Medical Research Council (MRC) and the University of Bristol fund the  
29 MRC Integrative Epidemiology Unit [MC\_UU\_12013/1, MC\_UU\_12013/9]. NMD is  
30 supported by the Economics and Social Research Council (ESRC) via a Future  
31 Research Leaders Fellowship [ES/N000757/1]. The research described in this paper was  
32 specifically funded by a grant from the Economics and Social Research Council for  
33 Transformative Social Science. No funding body has influenced data collection,  
34 analysis or its interpretations. This publication is the work of the authors, who serve as  
35 the guarantors for the contents of this paper. This work was carried out using the  
36 computational facilities of the Advanced Computing Research Centre -  
37 <http://www.bris.ac.uk/acrc/> and the Research Data Storage Facility of the University of  
38 Bristol - <http://www.bris.ac.uk/acrc/storage/>. This research was conducted using the UK  
39 Biobank Resource.

40  
41 **Data access:** The statistical code used to produce these results can be accessed here:  
42 (<https://github.com/nmdavies/UKbiobankROSLA>). The final analysis dataset used in  
43 this study is archived with UK Biobank, which can be accessed by contacting UK  
44 Biobank [access@biobank.ac.uk](mailto:access@biobank.ac.uk).

45

46 **Abstract**

47 Educated people are generally healthier, have fewer comorbidities and live longer than  
48 people with less education. Previous evidence about the effects of education come from  
49 observational studies many of which are affected by residual confounding. Legal  
50 changes to the minimum school leave age is a potential natural experiment which  
51 provides a potentially more robust source of evidence about the effects of schooling.  
52 Previous studies have exploited this natural experiment using population-level  
53 administrative data to investigate mortality, and relatively small surveys to investigate  
54 the effect on mortality. Here, we add to the evidence using data from a large sample  
55 from the UK Biobank. We exploit the raising of the school-leaving age in the UK in  
56 September 1972 as a natural experiment and regression discontinuity and instrumental  
57 variable estimators to identify the causal effects of staying on in school. Remaining in  
58 school was positively associated with 23 of 25 outcomes. After accounting for multiple  
59 hypothesis testing, we found evidence of causal effects on twelve outcomes, however,  
60 the associations of schooling and intelligence, smoking, and alcohol consumption may  
61 be due to genomic and socioeconomic confounding factors. Education affects some, but  
62 not all health and socioeconomic outcomes. Differences between educated and less  
63 educated people may be partially due to residual genetic and socioeconomic  
64 confounding.

65 **Significance Statement**

66 On average people who choose to stay in education for longer are healthier, wealthier,  
67 and live longer. We investigated the causal effects of education on health, income, and  
68 well-being later in life. This is the largest study of its kind to date and it has objective  
69 clinic measures of morbidity and aging. We found evidence that people who were forced  
70 to remain in school had higher wages and lower mortality. However, there was little  
71 evidence of an effect on intelligence later in life. Furthermore, estimates of the effects of  
72 education using conventionally adjusted regression analysis are likely to suffer from  
73 genomic confounding. In conclusion, education affects some, but not all health  
74 outcomes later in life.

75 **Introduction**

76 On average educated people are healthier, happier, more intelligent, richer, and live  
77 longer than those with less education. We do not know whether this is because education  
78 directly causes these outcomes, by affecting behaviors, such as smoking, or if these  
79 differences are due to other factors, such as socioeconomic or genomic differences.  
80 Whether education causes differences in outcomes later in life has been the subject of  
81 significant debate by epidemiologists, economists and other social scientists.(1–14)  
82 Economists have argued that a substantial portion of the benefits of education accrue via  
83 its potential effects on mortality and morbidity.(14) Epidemiologists have found that  
84 people who attended university have higher fluid intelligence in adulthood.(15) These  
85 associations are robust to adjustment for parental social class and adolescent cognition,  
86 which has been taken by some as proof that education causes later outcomes.(16)  
87 Despite this, many epidemiologists and economists are acutely aware that correlation,  
88 and multivariable adjusted regression, can be unreliable evidence of causation.(17–19)  
89 The ideal study design to definitively prove whether education has causal effects would  
90 be to randomize the age at which children leave school. However, this experiment would  
91 not be ethical, cost-effective, or timely. A more feasible, but potentially robust, research  
92 design is to exploit natural experiments that affected when people left school but are not  
93 related to confounding factors.(20, 21) One widely used form of natural experiment is to  
94 exploit changes in the legal minimum school leaving age. These changes forced some  
95 people to stay in school for longer than they would have otherwise chosen.

96

97 In September 1972, the United Kingdom raised the school-leaving age from age 15 to  
98 16. Researchers have previously used this policy change to investigate the effects of  
99 forcing students to stay in school longer using administrative data and longitudinal

100 cohort studies.(1, 22–24) However, the cohort studies had relatively small samples and,  
101 as a result, had to include people who were born many years before and after the reform.  
102 These studies produced relatively imprecise estimates of the effects of education.  
103 Previous results from administrative data lacked detailed information on covariates to  
104 identify people born in England affected by the reform or measures of many of the  
105 outcomes of interest such as cognition.

106

107 In the current study, we used the raising of the school-leaving age in 1972 as a natural  
108 experiment to estimate the causal effects of schooling. We used a regression  
109 discontinuity design and used novel data from the UK Biobank.(25, 26) We add to the  
110 literature in two ways. First, this is the largest sample with detailed individual-level  
111 information from the school years immediately before and after the reform. Second, we  
112 used genome-wide data to prove that the observational associations of education and  
113 other outcomes are likely to suffer from genomic confounding.

## 114 **Results**

115 Of the 502,644 participants in the UK Biobank, who were all aged between 37 and 73 at  
116 recruitment in 2008, 423,106 were born in England, see **Figure 1** for a flow diagram of  
117 exclusion and inclusion of participants in this study. See **Table 1** for a description of  
118 their characteristics. The youngest participants, those born between 1960 and 1971  
119 obtained more education than those born earlier in the twentieth century (**Figure 2**).  
120 This is consistent with the well-documented secular increase in the length of education  
121 over the period.(1) UK Biobank includes 11,240 and 10,898 participants who turned 15  
122 years old in the first year before and the first year after the school-leaving age increased.  
123 Before the reform, 85% of participants stayed in school after the age of 15, whereas after

124 the reform almost 100% of participants remained in school after the age of 15. The  
125 proportions of men and women who remained in school after age 15 increased over time  
126 (**Figures 3 and 4**). Participants born in July and August could still technically leave  
127 school before their 16<sup>th</sup> birthday, so on average participants born in the summer term  
128 report leaving school at a younger age.

129

### 130 **Covariate Balance Tests**

131 People who stayed in school after age 15 had higher birth weights; mothers who were  
132 less likely to smoke during pregnancy; were taller than average at age 10 relative to their  
133 peers; were more likely to have been breastfed; had fewer siblings; and were more likely  
134 to have parents who were alive; they were more likely to have SNPs known to be  
135 associated with higher educational attainment(27) (**Table 2**). In comparison, there were  
136 few detectable baseline differences between people affected and unaffected by the  
137 reform. The only detectable difference was that participants in the first year affected by  
138 the reform were 4.3 (95% confidence intervals (95%CI): 2.5 to 6.1) and 3.7 (95%CI: 2.6  
139 to 4.8) percentage points more likely to have an alive father and mother when they  
140 attended the assessment center in 2008-2010. There was weak evidence that fewer  
141 participants in the younger cohort were breastfed. The participants affected by the  
142 reform are, by definition, one year younger than those who were not affected. The raw  
143 differences above do not account for this age difference. We investigated whether these  
144 associations were simply due to the effects of age by estimating the effects of two  
145 negative control “placebo” reforms. For the first placebo reform, we constructed a  
146 sample of the two school years born before the reform (negative control sample 1) and  
147 for the second, we used the two first two school years after the reform (negative control  
148 sample 2). We estimated the difference in outcomes between the school years in exactly

149 the same way as described above for the true reform. As with the true reform, on  
150 average there is a year difference in age between the two school years in the negative  
151 control samples. Therefore, if the differences between those unaffected by the reform  
152 and those affected were solely due to aging, then we should see similar differences  
153 between the two school cohorts who turned 15 before the reforms occurred, and the two  
154 school cohorts who turned 15 after the reform occurred. We know that all the  
155 participants in the two negative control samples experienced the same school leaving  
156 age. We found few differences between the two school years in negative control sample  
157 1, or negative control sample 2. The only detectable differences were that the younger  
158 cohorts in both cases were more likely to have parents who were alive and were less  
159 likely to be breastfed (**Table 3**). These results suggest that participants unaffected and  
160 affected by the reform had similar observed covariates. This suggests that environmental  
161 or genomic confounding is unlikely to bias estimates which use the raising of the  
162 school-leaving age to identify the effects of education. In contrast socioeconomic and  
163 genomic factors confound the associations of school and later outcomes. Participants  
164 who *chose* to stay in school had more advantaged backgrounds and were more likely to  
165 have genetic variants associated with educational attainment.

### 166 **Reduced form**

167 We report two comparisons: first, the differences between participants who chose to stay  
168 in school after the age of 15 and those who left, and second, the difference between  
169 participants who were not affected by the reform (those born before September 1957)  
170 and those who were affected by it (those born in or after September 1957). On average  
171 participants who stayed in school after age 15 had better outcomes later in life. Fewer  
172 educated participants were diagnosed with high blood pressure; diabetes; a stroke; or a  
173 heart attack; or died (left columns in **Table 4**). There were minor differences in cancer

174 diagnoses by education level. Fewer participants who stayed in school were diagnosed  
175 with depression. Educated people had stronger grip strength, lower arterial stiffness; and  
176 lower blood pressure. They were also taller, lighter, and achieved higher scores on  
177 intelligence tests. Participants who left school at age 15 reported similar levels of  
178 happiness as those who stayed on. Educated people drank more alcohol, but were much  
179 less likely to smoke. They were more likely to report higher incomes; watched less  
180 television, but exercised less. There were fewer differences between the participants  
181 affected and unaffected by the reform (right columns in **Table 4**). Participants affected  
182 by the reform were less likely to report having high blood pressure, diabetes, a stroke, a  
183 heart attack, or to have died. The results for the clinical measurements were mixed.  
184 Participants affected by the reform had higher grip strength, lower systolic blood  
185 pressure, but they had similar arterial stiffness, height, diastolic blood pressure,  
186 intelligence, and happiness to those unaffected by the reform. There was little evidence  
187 the reform affected alcohol or tobacco consumption. Participants affected by the reform  
188 spent less time watching television, and more time exercising, however, the associations  
189 with exercise were imprecise. Finally, participants affected by the reform more likely to  
190 earn over £18,000 and £31,000, but were no more likely to earn over £52,000 or  
191 £100,000 than those unaffected by the reform. We found some evidence that education  
192 may have a larger effect on men's chances of earning more than £31,000 ( $p$ -value for  
193 interaction=0.001), but no evidence of interaction with any other outcomes (**Tables S1**  
194 **and S2**). There was some evidence that the reform had larger effects on participants  
195 predicted to leave before the age of 16: specifically lowering the risk of diabetes,  
196 increased likelihood of earning over £31,000, increasing grip strength and happiness,  
197 and the likelihood of being diagnosed with a stroke and drank more alcohol (**Table S3**).



198 **Negative control samples**

199 As with the covariate balance tests above we investigated whether the differences in  
200 outcomes could be solely explained by the aging process using negative control samples.  
201 Participants within each negative control sample experienced the same minimum school  
202 leaving ages. Therefore, any differences in these negative control samples are likely to  
203 be due to the aging process and not an effect of education. **Table 5** reports the placebo  
204 results for the negative control samples. These cohorts estimate the average change in  
205 each outcome that can be attributed to becoming a year older. On average, the younger  
206 participants were less likely to report having high blood pressure, having had a heart  
207 attack or depression, had lower systolic and diastolic blood pressure, and arterial  
208 stiffness as measured in the clinic. They also reported watching less television. These  
209 differences are similar in size to differences in these outcomes observed in **Table 4**. This  
210 suggests these differences are due to the aging process and not an effect of the reform.  
211 However, this implies that the aging process cannot entirely explain remaining  
212 differences described above, and shown in **Table 4** (diagnosed with diabetes or stroke,  
213 mortality, grip strength, BMI, and having income over £18,000 or £31,000). The results  
214 differed by gender (**Tables S4** and **S5**). For example, there was evidence that on average  
215 female participants affected by the reform had 0.15 kg/m<sup>2</sup> (95%CI: 0.01, 0.30) lower  
216 BMI. These gender-specific effects are consistent with the literature.

217 **Instrumental variables**

218 The associations reported in **Table 4** are valid tests of the null hypothesis that education  
219 does not affect each outcome. Participants affected by the reform were 14.5 (95%CI:  
220 13.7, 15.2) percentage points more likely to remain in school past age 15 than those who  
221 were unaffected. This association is stronger than conventional thresholds for  
222 instrumental variable analysis (F-statistic=1393). In **Table 6** we report instrumental

223 variable estimates of the size of the effects of remaining in school past the age of 15.  
224 These results suggest that remaining in school reduced the probability of being  
225 diagnosed with diabetes, stroke, or dying by 4.5 (95%CI: 2.7 to 6.3), 1.7 (95%CI: 0.6 to  
226 2.8), and 2.9 (95%CI: 1.3 to 4.5) percentage points. These estimates are larger than the  
227 conventional linear regression (Hausman test for differences  $p=9.7E-7$ ,  $p=0.002$ , and  
228  $p=3.4E-4$ ). Staying in school also increased the participants grip strength by 2.89  
229 (95%CI: 2.38 to 3.39) kg, which again was more than implied by the conventional linear  
230 regression (Hausman  $p$ -value= $3.6E-29$ ). Finally, the instrumental variable results imply  
231 that staying in school increases the likelihood of earning more than £18,000 or £31,000  
232 by 5.6 (95%CI: 1.5 to 9.6) and 18.8 (95%CI: 14.9 to 22.6) percentage points. Both of  
233 these estimates are smaller than implied by conventional linear regression (Hausman  $p$ -  
234 values= $0.001$ ). These results exceeded the Benjamini and Hochberg (1995) false  
235 discovery rate threshold at  $\delta=0.05$  across 25 outcomes.(28) **Figures 5** and **6** show the  
236 differences between the conventional linear regression results and the instrumental  
237 variable results. They plot the point estimate and confidence intervals for the  
238 conventional linear regression and the instrumental variable results. **Tables S6** and **S7**  
239 report the instrumental variable results stratified by gender.

## 240 **Discussion**

241 This study provides some of the strongest evidence to date about the causal effects of  
242 education. First, our instrumental variable results indicate that socioeconomic and  
243 genomic factors can explain some of the observed associations of educational attainment  
244 and outcomes later in life. In contrast to the observational associations, we found little  
245 evidence that education had causal effects on smoking, alcohol consumption, arterial  
246 stiffness, intelligence, or likelihood of having an annual income over £100,000. Second,

247 our results provide robust evidence that education is likely to have a causal effect on  
248 other outcomes, including diagnoses of diabetes, stroke, mortality, grip strength and  
249 having incomes above £18,000 and £31,000. Finally, we found molecular genetic  
250 evidence that traditional approaches to investigate the effects of educational attainment,  
251 such as multivariable adjusted regression, are likely to suffer from residual genomic  
252 confounding.

253

254 Clark and Royer found the participants of the Health Survey for England and the  
255 General Household Survey affected by the reform were by 26.1 (95%CI: 23.0 to 29.2)  
256 percentage points more likely to stay in school after age 15.(1) We found a smaller  
257 difference (14.0, 95%CI: 12.9 to 15.1), this may be because on average the participants  
258 of UK Biobank are more educated. Clark and Royer found little evidence that the raising  
259 of the school-leaving age reduced mortality (odds-ratio=0.99, 95%CI: 0.94 to 1.05).  
260 Whereas we found people affected by the reform had a lower risk of death (odds-  
261 ratio=0.64, 95%CI: 0.50 to 0.83). We found little evidence of reductions in mortality in  
262 the two negative control samples odds-ratios= 1.22 (95%CI: 0.97 to 1.53) and 1.08  
263 (95%CI: 0.91 to 1.29) for negative control samples 1 and 2, in the two years before and  
264 the two years after the reform. Clark and Royer found little evidence of effects of the  
265 reform on self-reported health. This may be because they used relatively liberal  
266 bandwidths, up to 138 months either side of the reform. This meant they were  
267 comparing individuals born up to 11.5 years before the reform, to individuals who were  
268 born up to 11.5 years after the reform. For some, but not all, analyses they allowed for a  
269 month and year of birth trend, which was allowed to change after the reform. The  
270 advantage of using such a liberal bandwidth is that they could include more data, and to  
271 obtain sufficiently precise results. However, this is potentially at the expense of

272 introducing bias by comparing individuals who differ because of secular trends. We  
273 obtained similar precision to Clark and Royer using a highly conservative 12-month  
274 bandwidth. As a sensitivity analysis, we provide results using a comparable specification  
275 to Clark and Royer in the supplementary materials, see **Tables S8, S9, and S10**.  
276 Furthermore, the majority of their health outcomes were self-reported in a general health  
277 survey, whereas we had precise clinic measures of specific measures of gaining which  
278 are known to change with age, such as grip strength. This means our outcomes are likely  
279 to suffer from less measurement error. Our data were consistently measured in a single  
280 study across a relatively narrow time window, whereas previous results pooled data  
281 from many years. Again this means our results are likely to suffer from less  
282 measurement error.

283

284 Epidemiologists have argued that education has causal effects on intelligence later in  
285 life. For example, Richards and Sacker found that educational attainment by age 26 was  
286 associated with intelligence at age 53,(29) which they argue was evidence that education  
287 had a causal effect on intelligence.(16) However, Deary and Johnson raised doubts  
288 about this interpretation and called for greater clarity about the assumptions underlying  
289 these analyses.(19) We found little evidence of a causal effect of education on  
290 intelligence later in life. Nguyen and colleagues used increases in the legal school-  
291 leaving ages in the United States to investigate the effects of education on risk of  
292 dementia later in life.(21) They found evidence that education reduced the risk of  
293 dementia. We cannot test this hypothesis in the UK Biobank because too few  
294 participants have been diagnosed with dementia.

295

296 People with more education are much less likely to smoke. However, it is not clear  
297 whether this is due to a causal effect of education. Gilman and colleagues found the  
298 association between education and smoking status was attenuated in sibling fixed effects  
299 designs.(30) We found that participants who remained in school were 20.1 percentage  
300 points less likely to have ever smoked. However, we found little evidence that the  
301 raising of the school leaving age affected smoking behavior. We also found that  
302 educated participants drank more heavily, but there was little evidence that this was  
303 caused by education. This is consistent with recent evidence from other UK surveys.  
304 Silles (2015) used data from the General Household Survey for Great Britain and found  
305 that whilst people who left school at an older age were less likely to smoke, there were  
306 few differences in ever-smoking rates among individuals unaffected and affected by the  
307 1947 and 1972 raising of the school leaving age.(31) We also found some evidence that  
308 the effects of the reform were greatest in participants who would otherwise have been  
309 expected to leave at age 15.

310

### 311 **Strengths and limitations**

312 A key strength of our study is that we used a natural experiment to identify the effects of  
313 education. The raising of the school-leaving age in 1972 provided exogenous variation  
314 in the length of schooling people received. We found few pre-existing differences  
315 between participants on either side of the reform, suggesting that it can be used as a  
316 potentially valid instrumental variable.(32) A strength of our study is it uses one of the  
317 largest samples to date to investigate the effects of education on a wide range of  
318 outcomes. Our outcomes were recorded both in interviews and via linked Office of  
319 National Statistics registry data. This means our outcomes are likely to suffer from  
320 relatively little measurement error. Furthermore, we were able to restrict our sample to

321 people born in England who were affected by the reform. In addition, we used genome-  
322 wide data to show that conventional multivariable adjusted regression results are likely  
323 to suffer from genomic confounding. A potential limitation of our study is that our  
324 treatment group, people affected by the reform, are one year younger than our control  
325 group, those unaffected by the reform. Many of the outcomes we investigated increase  
326 linearly or log-linearly over time. This means it is difficult to determine if any  
327 differences we observed are due to an additional year of aging or the reform. We  
328 addressed this by using negative control samples to estimate the average effects of  
329 aging. For the results for outcomes such as blood pressure, where we observed similar  
330 differences in the negative control samples as the main results, are likely to be due to  
331 aging and not an effect of the reform. However, it is likely the reform affected  
332 outcomes, such as income, where we observed much larger differences in the main  
333 results than in the negative control samples. Further, aging cannot explain why we found  
334 little evidence of causal effects of staying in school on intelligence, smoking, and  
335 alcohol consumption.

336

337 Whilst a representative sample is not a necessary condition for making causal  
338 inferences,(33) collider bias could affect our results because Biobank is a volunteer  
339 sample, which over-represents highly educated people. People affected by the reform  
340 may be more likely to participate in the study.(34) Therefore less educated individuals,  
341 who would have stayed in school had they attended school after the reform (the  
342 compliers), may be under-represented in the pre-reform sample. If true, this could  
343 attenuate our results towards the null, because these marginal students would reduce the  
344 average outcome in the “treatment” group, and be missing from the “control” group.  
345 This would improve the control group’s outcome relative to the treatment group.

346 Nevertheless, our results are consistent with previous results which used random  
347 samples.(31) So collider bias is unlikely to explain why there was little evidence that the  
348 reform affected intelligence, smoking and alcohol consumption. However, this issue  
349 warrants further investigation in future research. There was limited time to collect  
350 measures during the participants' assessment center visits, therefore our measure of  
351 intelligence is relatively coarse. However, despite this, participants who remained in  
352 school had substantially higher intelligence. Our instrumental variable estimates of the  
353 effects of schooling on intelligence are sufficiently precise to rule out even relatively  
354 small effects on intelligence. Finally, our instrumental variable results are estimates of  
355 the local average treatment effect of schooling.(35) Specifically, they are the estimates  
356 of the causal effects of being forced to remain in school after the age of 15, on those  
357 who would otherwise have left school. These effects may not be externally valid to infer  
358 either the effects of compelling students to remain in school for longer or of the effects  
359 on other populations.(36, 37) This means these results may not be valid estimates of the  
360 effect of education on "always takers", that is people who would always remain in  
361 school regardless of the reform. Nevertheless, our results are likely to be internally valid  
362 estimates of the effects of schooling on people affected by the reform.

363

## 364 **Conclusions**

365 Does education have causal effects? Yes, whilst education is not the panacea implied by  
366 naïve multivariable adjusted regression, in this sample staying in school did result in  
367 substantial benefits. We found robust evidence that staying in school is likely to have  
368 causal effects on some, but not all health and socioeconomic outcomes later in life. This  
369 adds to our understanding of the long-term consequences of educational decisions in  
370 childhood and adolescence. We resolve two debates about the causal effects of

371 schooling. First, our results suggest education is unlikely to cause differences in  
372 intelligence later in life.(16, 19) Second, previous research using these reforms found  
373 little evidence that education affected health, may be due to poor measurement of health  
374 outcomes and inadequate statistical power.(1)  
375

## 376 **Materials and Methods**

### 377 **Data**

378 We used data from 502,624 participants of the UK Biobank project.(25) The  
379 participants, aged between 40 and 69, were originally recruited between 2006 and 2010.  
380 In our primary analysis, we restricted our sample to participants were born in England in  
381 the school cohorts in years immediately before and after the reform took place. We do  
382 this because we have a large enough sample born in these years to precisely identify the  
383 effects of schooling.

384

### 385 **Exposure: left school after age 15**

386 The participants were asked if they had a college or university degree. If they did not  
387 have a degree they were asked what age they left full-time education. We coded  
388 participants who reported having a degree as leaving full-time education at age 21.

389

### 390 **Outcomes**

#### 391 **Health outcomes**

392 The participants were asked whether they had ever been diagnosed by a doctor with the  
393 following health conditions: high blood pressure, stroke, diabetes, or heart attack. They  
394 were asked if they had ever had a whole week where they felt depressed or down. The



395 death of the participants was defined using linked Office of National Statistics mortality  
396 data. Follow-up for the linked mortality data started with the first death on 10<sup>th</sup> May  
397 2006 ended with the last recorded death on 17<sup>th</sup> February 2014. The diagnoses of cancer  
398 and information were taken from the cancer registry. The first recorded cancer diagnosis  
399 was on 20<sup>th</sup> September 1957 and the last on 25<sup>th</sup> October 2013.

400

#### 401 **Height, BMI, Blood pressure, atrial stiffness, grip strength, and intelligence**

402 Height and weight were measured during the participants' visit to a UK Biobank  
403 assessment center. Two measures of diastolic and systolic blood pressure were recorded  
404 via an electronic blood pressure monitor. The measurements were taken two minutes  
405 apart. Atrial stiffness was measured using an electronic measure device. Grip strength  
406 was measured in kilos using a hydraulic hand dynamometer. We residualized the  
407 measures of grip strength and atrial stiffness to control for potential between device  
408 heterogeneity. Fluid intelligence was measured via 13 logic puzzles that the participants  
409 had to answer in 2 minutes. Their score is the number of correct answers.

410

#### 411 **Health behaviors and income**

412 During their assessment center visit, the participants were asked to report their health  
413 behaviors. They were asked about how frequently they consumed alcohol. This is coded  
414 6 if they drank every day, 5 for three or four times a week, 4 for once or twice a week, 3  
415 for one to three times a week, 2 for special occasions only, and 1 for never. They were  
416 asked if they smoked, or had ever smoked. They were asked how often they vigorously  
417 and moderately exercised in a typical week. Finally, they were asked if their pre-tax  
418 income was below £18,000; between £18,000 and £30,999; between £31,000 and

419 £50,999; between £52,000 and £100,000; or above £100,000. Participants who did not  
420 answer these questions were coded as missing.

#### 421 **Genotype data**

422 The participants provided a blood sample. This sample was used to extract DNA and  
423 genotype using the Axiom and BiLEVE genome-wide arrays. These arrays genotyped  
424 around 800,000 single nucleotide polymorphism (SNPs) for each participant. The  
425 genotyping data was used to impute SNPs which were not directly genotyped using the  
426 1000 genomes and UK10K reference panels. The imputation produced a likelihood of  
427 each participant having a specific genotype at each (e.g. AA=0.1, TA=0.9, and TT=0).  
428 This resulted in a dataset of around 80,000,000 SNPs. For each participant, we created a  
429 genome-wide allele score by summing the number of genetic variants they had that were  
430 associated with higher educational attainment. We weighted each variant by its  
431 association with education reported in a large genome-wide association study.(27) This  
432 study reported the association of 8,259,394 genetic variants and the years of education in  
433 a meta-analysis of 64 studies, which did not include the UK Biobank. We normalized  
434 the allele score have mean zero and standard deviation one. The allele score represents  
435 the effects of the known effects of genetic variants on educational attainment. However,  
436 these scores only explain a minority ( $r^2=1.32\%$  in the full Biobank sample) of the  
437 variation in educational attainment explained by genome-wide data.(27, 38, 39) This is  
438 because of limited statistical power of existing genome-wide association studies of  
439 educational attainment. One consequence of this is that the genetic score is too poor a  
440 proxy for the total genetic effects on educational attainment to be used as a conventional  
441 covariate in a regression. However, this score does provide a valid test of the null-  
442 hypothesis that previously unobserved genetic covariates do not confound the  
443 association of education and other outcomes.(32)

444 **Statistical methods**

445 We use the changes in the school-leaving age to identify the effects of schooling on a  
446 range of outcomes. Our empirical strategy has five steps. First, we estimated the effect  
447 of the reforms on the proportion of participants who remained in school after age 15.  
448 Second, we investigated the associations of potential confounders with educational  
449 attainment and across the cohorts affected by the reform.(32) Third, we estimated the  
450 reduced form associations of the reform and the outcomes. Fourth, we used instrumental  
451 variable estimators to estimate the effects of the attending school on each of the  
452 outcomes. For continuous outcomes, we used conventional two-stage least squares,(40)  
453 for binary outcomes we used semi-parametric additive structural mean models.(41) To  
454 address concerns about multiple hypothesis testing, we report whether the instrumental  
455 variable results for each outcome exceed a Benjamini and Hochberg (1995) false  
456 discovery rate threshold at  $\delta=0.05$  across 25 outcomes.(28) Fifth, we conducted two  
457 negative control analyses.(28) We did this by constructing two cohorts of students, born  
458 in the two school years before and the two years after the reform. Analogous with the  
459 primary cohort we designated participants born in the more recent of the two school  
460 years as being exposed to the “placebo” reform. There are no institutional differences  
461 between each year, therefore any differences observed in these negative control cohorts  
462 will be due age effects and not an effect of raising the school-leaving age.

463

464 **Identification**

465 The raising of the school-leaving age will be a valid natural experiment for testing  
466 whether remaining in school at age 15 affects later outcomes under the following three  
467 assumptions. First, participants who attended school after the leaving age was increased  
468 must be more likely to stay in school. Second, there must be no pre-existing differences

469 between the cohort who attended school in the year immediately before and immediately  
470 after the reform. Finally, the reform must not have any other direct effects on the  
471 outcomes. We can test the first assumption by testing whether participants affected by  
472 the reform are more likely to stay in school. We can falsify the second assumption by  
473 investigating if there were any pre-existing differences between those affected and  
474 unaffected by the reform. The final assumption cannot be empirically tested, and could  
475 be invalid if the reform also affected the labor market around the time that the  
476 participants entered the workforce. However, claimant count statistics for the UK show  
477 that the cohorts entering the labor force immediately before and after the reform faced  
478 broadly similar conditions, with increases in unemployment related to the oil crises of  
479 the 1970s not being seen until 1975 onwards.(42, 43)

480

#### 481 **1. The effect of increasing the minimum leaving age on educational attainment**

482 We used a regression discontinuity design to estimate the effects of increasing the  
483 school-leaving age from age 15 to 16 on the proportion of students who report leaving  
484 school before the age of 15. To investigate the effect of the reform on school attendance  
485 we estimated a regression of staying school after age 15 on a dummy variable equal to  
486 one if the participant was a member of the cohort affected by the reform, and equal to  
487 zero if they were not affected. In this and all subsequent analyses we included covariates  
488 for the month of birth, to control for seasonality, and gender. In contrast to Clark and  
489 Royer (2013), we do not include a term for birth cohort because we restricted our  
490 sample to people born in the single school years immediately before and after the  
491 reform. The regression discontinuity design is identified by assuming that the reform is  
492 independent of the unobserved confounding factors, and has no other direct effects on  
493 the outcome. The effect of the reform on the probability of participants staying in school

494 after the age of 15, our parameter of interest, is the effect of remaining in school on  
495 those who were affected by the reform. This is a local average treatment effect.(35) We  
496 report this parameter on the risk difference scale. Our regressions allow for general form  
497 heteroskedasticity and clustering by year and month of birth.

498

## 499 **2. Covariate balance tests**

500 We compared the associations of eleven potential confounders  $C_{ict}$  and the exposure,  
501 left school after the age of 15,  $E_{ict}$ , and the indicator of the reform,  $D_{ic}$ . We estimated  
502 these associations conditional on the same set of covariates,  $X'_{ict}$ , as above and the  
503 standard errors allow for clustering by year and month of birth.

504

## 505 **3. Effects of increasing the school-leaving age on outcomes in later life**

### 506 **A. Reduced form**

507 We estimated the associations of leaving school after age 15 and the outcomes and the  
508 association of the reform and each of the outcomes using the following linear  
509 regressions:

$$510 \quad H_{ict} = \delta_0 + \delta_1 E_{ic} + w_{ict}, \text{ and}$$

511

$$H_{ict} = \tau_0 + \tau_1 D_{ic} + \zeta_{ict}$$

512

513 The first is a linear regression of each of the health outcomes on whether the participant  
514 stayed in school after the age of 15. The second regression is the reduced form  
515 association of the health outcomes and the reform. As above, each regression includes  
516 terms for gender and month of birth to account for the season of birth. The reduced form  
517 is a valid test of the null-hypothesis that schooling does not affect the outcomes.

518

519 We tested whether the reform had larger effects on people who would otherwise have  
520 been expected to leave school at age 15. We estimated the probability that a participant  
521 would remain in school after the age of 15 using logistic regression and data from  
522 individuals born before 31<sup>st</sup> August 1956. This model included indicators for the  
523 participants' assessment center, year and month of birth, sex, whether mother smoked  
524 during pregnancy, were breastfed, their relative height and body size at age 8, number of  
525 brothers and sisters, the normalized genome-wide education score, and their ethnicity.  
526 Missing data were replaced at the mean and indicators variables for missing values were  
527 included. We estimated the following regression:

$$H_{ict} = \varphi_0 + \varphi_1 D_{ic} + \varphi_2 D_{ic} \hat{E}_{ic} + \varphi_3 \hat{E}_{ic} + \zeta_{ict}$$

528 Where  $\hat{E}_{ic}$  is probability of remaining in education from the logistic regression. For each  
529 outcome we report the coefficients on the reform indicator, and the coefficient on the  
530 interaction term and the effect of the reform. The effect of the reform on participants  
531 predicted to leave is indicated by  $\varphi_1$ , and the effect on those expected to stay is  
532 indicated by  $\varphi_1 + \varphi_3$ . As with the main results above we adjust for sex and month of  
533 birth, and the interaction of these variables with predicted education.(44)

534

### 535 **B. Instrumental variables**

536 We estimated the causal effect of schooling using instrumental variables estimators. For  
537 the continuous outcomes, we estimated mean differences using Two-Stage Least  
538 Squares (2SLS),(40) and for the binary outcomes we estimated risk differences using  
539 additive structural mean models.(41) These models can be identified by making one of  
540 three assumptions.(41) First, for the continuous outcomes we could assume that staying  
541 in school has the same effect on the outcomes for all participants. This identifies the  
542 average effects of staying in school but is implausible for binary outcomes.(45) Second,  
543 for the binary outcomes, we could assume a monotonic relationship between the reform

544 and the participants' likelihood of staying in school after the age of 15. In the potential  
545 outcomes framework, we assumed that  $E[Y(1) - Y(0) | E(1) - E(0) > 0]$ . This  
546 requires that there were no participants who were "defiers", who would have stayed in  
547 school if they were not affected by the reform, but would have left school if they were  
548 affected by the reform. Under monotonicity, the instrumental variable estimators  
549 estimate a local average treatment effect. This is the effects of treatment in the sub-  
550 group of participants whose decisions were affected by the reform.(40) That is the  
551 people in the year after the reform who would have chosen to leave school at 15 had the  
552 reform not been introduced. Finally, we could assume that the effects of education are  
553 not affected by the reform (no effect modification). This would identify the effects of  
554 education on participants who chose to stay in school. We report the partial F-statistic of  
555 the association of remained in school  $E_{ict}$  and the reform  $D_{ic}$ . We also report the test for  
556 endogeneity (using a C-statistic, which is a heteroskedasticity robust Hausman test (46,  
557 47), that  $E[E_{ict}w_{ict}] = 0$ . This implicitly tests for differences between the linear  
558 regression and instrumental variable estimates.(47) All estimates allow for clustered  
559 standard errors by year and month of birth and include controls for gender.

560

### 561 **C. Regression discontinuity design**

562 Finally, we used a regression discontinuity design with variable bandwidths to  
563 investigate the robustness of our findings. This is a fuzzy regression discontinuity  
564 design, as the reform only increased the probability of staying in school.(48) In our main  
565 analysis above we present reduced forms on the participants born between September  
566 1956 and August 1958. This is a regression discontinuity design estimates mean  
567 differences with a bandwidth of one year. We used the rd command in Stata to produce  
568 local linear regression discontinuity estimates for larger bandwidths as a sensitivity  
569 analysis.(49)

570

571 **D. Negative control samples**

572 We were concerned that differences between the two school years may occur because of  
573 the participants affected by the reform were a year younger on average than participants  
574 unaffected by the reform. To investigate this, we investigated the effects of two placebo  
575 reforms. The first placebo reform compares the cohort which left school two years  
576 before the reform was introduced (i.e. those born between September 1955 and August  
577 1956) to the cohort that left school in the year before the reform was introduced (i.e.  
578 those born between September 1956 to August 1957). The second compares participants  
579 in the school cohort in the year after the reform, (i.e. those born between September  
580 1957 to August 1958) to those in the cohort two years after the reform (i.e. those born  
581 between September 1958 to August 1959). These cohorts have the same average  
582 difference in age as the two school years either side of the reform, but they experienced  
583 the same school-leaving age. Therefore, any differences between the younger and older  
584 school years in these negative control samples are likely to be due to aging and will not  
585 be due to the effects of education. We estimated the reduced form associations using  
586 these negative control samples. We repeated all of the analyses stratified by sex as a  
587 sensitivity analysis and report these results in the online appendix.

588

589 All analyses were conducted in StataMP 14.0.(50) Code used to generate these results  
590 can be found at (<https://github.com/nmdavies/UKbiobankROSLA>) and the data used has  
591 been archived with UK Biobank (<http://www.ukbiobank.ac.uk>) and can be accessed by  
592 contacting the study ([access@ukbiobank.ac.uk](mailto:access@ukbiobank.ac.uk)). The protocol for this study is available  
593 as an online appendix.

594

595



596 **Acknowledgements**

597 We would like to thank the Social Science Genetic Association Consortium for  
598 providing the coefficients from the Educational attainment GWAS, and Gibran Hemani,  
599 Lavinia Paternoster, David Carlsake, Jack Bowden, Louisa Zuccolo Evie Stergiakouli  
600 and Eleanor Sanderson for helpful comments on an earlier draft. All mistake remain our  
601 own.  
602

603 **References**

604

605 1. Clark D, Royer H (2013) The Effect of Education on Adult Mortality and Health:  
606 Evidence from Britain. *Am Econ Rev* 103(6):2087–2120.

607 2. Bulik-Sullivan BK, et al. (2015) LD Score regression distinguishes confounding from  
608 polygenicity in genome-wide association studies. *Nat Genet* 47(3):291–295.

609 3. Conti G, Heckman J, Urzua S (2010) The Education-Health Gradient. *Am Econ Rev*  
610 100(2):234–238.

611 4. Naess O, Hoff DA, Lawlor D, Mortensen LH (2012) Education and adult cause-  
612 specific mortality--examining the impact of family factors shared by 871 367  
613 Norwegian siblings. *Int J Epidemiol* 41(6):1683–1691.

614 5. Lager ACJ, Torssander J (2012) Causal effect of education on mortality in a quasi-  
615 experiment on 1.2 million Swedes. *Proc Natl Acad Sci* 109(22):8461–8466.

616 6. Meghir C, Palme M, Simeonova E (2012) *Education, Health and Mortality: Evidence*  
617 *from a Social Experiment* (National Bureau of Economic Research, Cambridge,  
618 MA) Available at: <http://www.nber.org/papers/w17932.pdf> [Accessed November  
619 3, 2015].

620 7. Nordahl H, et al. (2014) Education and Cause-specific Mortality: The Mediating Role  
621 of Differential Exposure and Vulnerability to Behavioral Risk Factors.  
622 *Epidemiology* 25(3):389–396.

623 8. Mackenbach JP, et al. (2015) Variations in the relation between education and cause-  
624 specific mortality in 19 European populations: A test of the “fundamental causes”  
625 theory of social inequalities in health. *Soc Sci Med* 127:51–62.

626 9. Strand BH, et al. (2010) Educational inequalities in mortality over four decades in  
627 Norway: prospective study of middle aged men and women followed for cause  
628 specific mortality, 1960-2000. *BMJ* 340(feb23 2):c654–c654.

629 10. Baker DP, Leon J, Smith Greenaway EG, Collins J, Movit M (2011) The  
630 Education Effect on Population Health: A Reassessment. *Popul Dev Rev*  
631 37(2):307–332.

632 11. Spearman C (1904) “General Intelligence,” Objectively Determined and Measured.  
633 *Am J Psychol* 15(2):201.

634 12. Davey Smith G, et al. (1998) Education and occupational social class: which is the  
635 more important indicator of mortality risk? *J Epidemiol Community Health*  
636 52(3):153–160.

637 13. Schafer MH, Wilkinson LR, Ferraro KF (2013) Childhood (Mis)fortune,  
638 Educational Attainment, and Adult Health: Contingent Benefits of a College  
639 Degree? *Soc Forces* 91(3):1007–1034.

- 640 14. Cutler D, Lleras-Muney A (2006) *Education and Health: Evaluating Theories and*  
641 *Evidence* (National Bureau of Economic Research, Cambridge, MA) Available at:  
642 <http://www.nber.org/papers/w12352.pdf> [Accessed August 13, 2014].
- 643 15. Clouston SA, et al. (2012) Benefits of educational attainment on adult fluid  
644 cognition: international evidence from three birth cohorts. *Int J Epidemiol*  
645 41(6):1729–1736.
- 646 16. Richards M, Sacker A (2011) Is education causal? Yes. *Int J Epidemiol* 40(2):516–  
647 518.
- 648 17. Davey-Smith G, Ebrahim S (2001) Epidemiology--is it time to call it a day? *Int J*  
649 *Epidemiol* 30(1):1.
- 650 18. Leamer E (1983) Let's Take the Con out of Econometrics. *Am Econ Rev* 73(1):31–  
651 43.
- 652 19. Deary IJ, Johnson W (2010) Intelligence and education: causal perceptions drive  
653 analytic processes and therefore conclusions. *Int J Epidemiol* 39(5):1362–1369.
- 654 20. Angrist JD, Krueger AB (2001) Instrumental Variables and the Search for  
655 Identification: From Supply and Demand to Natural Experiments. *J Econ Perspect*  
656 15(4):69–85.
- 657 21. Nguyen TT, et al. (2015) Instrumental variable approaches to identifying the causal  
658 effect of educational attainment on dementia risk. *Ann Epidemiol*.  
659 doi:10.1016/j.annepidem.2015.10.006.
- 660 22. Dickson M (2013) The Causal Effect of Education on Wages Revisited\*: *The*  
661 *causal effect of education*. *Oxf Bull Econ Stat* 75(4):477–498.
- 662 23. Powdthavee N (2010) Does Education Reduce the Risk of Hypertension?  
663 Estimating the Biomarker Effect of Compulsory Schooling in England. *J Hum Cap*  
664 4(2):173–202.
- 665 24. Jürges H, Kruk E, Reinhold S (2013) The effect of compulsory schooling on  
666 health—evidence from biomarkers. *J Popul Econ* 26(2):645–672.
- 667 25. Collins R (2012) What makes UK Biobank special? *The Lancet* 379(9822):1173–  
668 1174.
- 669 26. O’Keeffe AG, et al. (2014) Regression discontinuity designs: an approach to the  
670 evaluation of treatment efficacy in primary care using observational data. *BMJ*  
671 349(sep08 3):g5293–g5293.
- 672 27. Okbay A, et al. (2016) Genome-wide association study identifies 74 loci associated  
673 with educational attainment. *Nature* 533(7604):539–542.
- 674 28. Benjamini Y, Hochberg Y (1995) Controlling the false discovery rate: a practical  
675 and powerful approach to multiple testing. *J R Stat Soc Ser B Methodol*:289–300.

- 676 29. Richards M, Sacker A (2003) Lifetime Antecedents of Cognitive Reserve. *J Clin*  
677 *Exp Neuropsychol Neuropsychol Dev Cogn Sect A* 25(5):614–624.
- 678 30. Gilman SE, et al. (2008) Educational attainment and cigarette smoking: a causal  
679 association? *Int J Epidemiol* 37(3):615–624.
- 680 31. Silles M (2015) The causal effect of schooling on smoking behavior. *Econ Educ*  
681 *Rev* 48:102–116.
- 682 32. Pischke J-S, Schwandt H (2014) *Poorly Measured Confounders are More Useful*  
683 *on the Left Than on the Right* (Working Paper, London School of Economics)  
684 Available at: [http://econ.lse.ac.uk/staff/spischke/ec533/C\\_var\\_note.pdf](http://econ.lse.ac.uk/staff/spischke/ec533/C_var_note.pdf) [Accessed  
685 April 9, 2015].
- 686 33. Rothman KJ, Gallacher JE, Hatch EE (2013) Why representativeness should be  
687 avoided. *Int J Epidemiol* 42(4):1012–1014.
- 688 34. Cole SR, et al. (2009) Illustrating bias due to conditioning on a collider. *Int J*  
689 *Epidemiol* 39(2):417–420.
- 690 35. Imbens GW, Angrist JD (1994) Identification and estimation of local average  
691 treatment effects. *Econom J Econom Soc* 62(2):467–475.
- 692 36. Deaton A (2010) Instruments, Randomization, and Learning about Development. *J*  
693 *Econ Lit* 48(2):424–455.
- 694 37. Imbens GW (2010) Better LATE Than Nothing: Some Comments on Deaton  
695 (2009) and Heckman and Urzua (2009). *J Econ Lit* 48(2):399–423.
- 696 38. Rietveld CA, et al. (2013) GWAS of 126,559 Individuals Identifies Genetic  
697 Variants Associated with Educational Attainment. *Science* 340(6139):1467–1471.
- 698 39. Hageaars SP, et al. (2015) *Shared genetic aetiology between cognitive functions*  
699 *and physical and mental health in UK Biobank (N = 112 151) and 24 GWAS*  
700 *consortia*. Available at: <http://biorxiv.org/lookup/doi/10.1101/031120> [Accessed  
701 November 11, 2015].
- 702 40. Angrist JD, Imbens GW, Rubin DB (1996) Identification of causal effects using  
703 instrumental variables. *J Am Stat Assoc* 91(434):444–455.
- 704 41. Clarke PS, Windmeijer F (2012) Instrumental Variable Estimators for Binary  
705 Outcomes. *J Am Stat Assoc* 107(500):1638–1652.
- 706 42. Buscha F, Dickson M (2015) The Wage Returns to Education over the Life-Cycle:  
707 Heterogeneity and the Role of Experience.
- 708 43. Denman J, McDonald P (1996) Unemployment statistics from 1881 to the present  
709 day. *Labour Mark Trends* 104(1):5–18.
- 710 44. Keller MC (2014) Gene  $\times$  Environment Interaction Studies Have Not Properly  
711 Controlled for Potential Confounders: The Problem and the (Simple) Solution. *Biol*  
712 *Psychiatry* 75(1):18–24.

- 713 45. Hernán MA, Robins J (2006) Instruments for causal inference: an epidemiologist's  
714 dream? *Epidemiology* 17(4):360–372.
- 715 46. Hayashi F (2000) *Econometrics* (Princeton University Press, Princeton).
- 716 47. Hausman JA (1978) Specification Tests in Econometrics. *Econometrica* 46(6):pp.  
717 1251–1271.
- 718 48. Lee DS, Lemieux T (2010) Regression Discontinuity Designs in Economics. *J*  
719 *Econ Lit* 48(2):281–355.
- 720 49. Nichols A (2014) rd: Stata module for regression discontinuity estimation. *Stat*  
721 *Softw Compon.*
- 722 50. StataCorp (2015) *Stata Statistical Software: Release 14* (StataCorp LP, College  
723 Station, TX).
- 724  
725

726 **Figure Legends**

727

728 **Figure 1: Flow chart of inclusion and exclusion of participants into the study.**

729

730 **Figure 2. Years of full-time education by quarter of birth.**

731

732 **Figure 3. Effects of the reform on the proportion of males staying in education**  
733 **after the age of 15.**

734

735 **Figure 4: Effects of the reform on the proportion of females staying in education**  
736 **after the age of 15.**

737

738 **Figure 5: Difference in risk of outcomes between those who left school after age 15.**  
739 **Estimated by actual education attainment (squares), and using the raising of the**  
740 **school-leaving age as an instrument (triangles).**

741

742 **Figure 6: Difference in mean outcomes between those who left school after age 15.**  
743 **Estimated by actual education attainment (squares), and using the raising of the**  
744 **school-leaving age as an instrument (triangles).**

745

746

**Figure 1: Flow chart of inclusion and exclusion of participants into the study.**

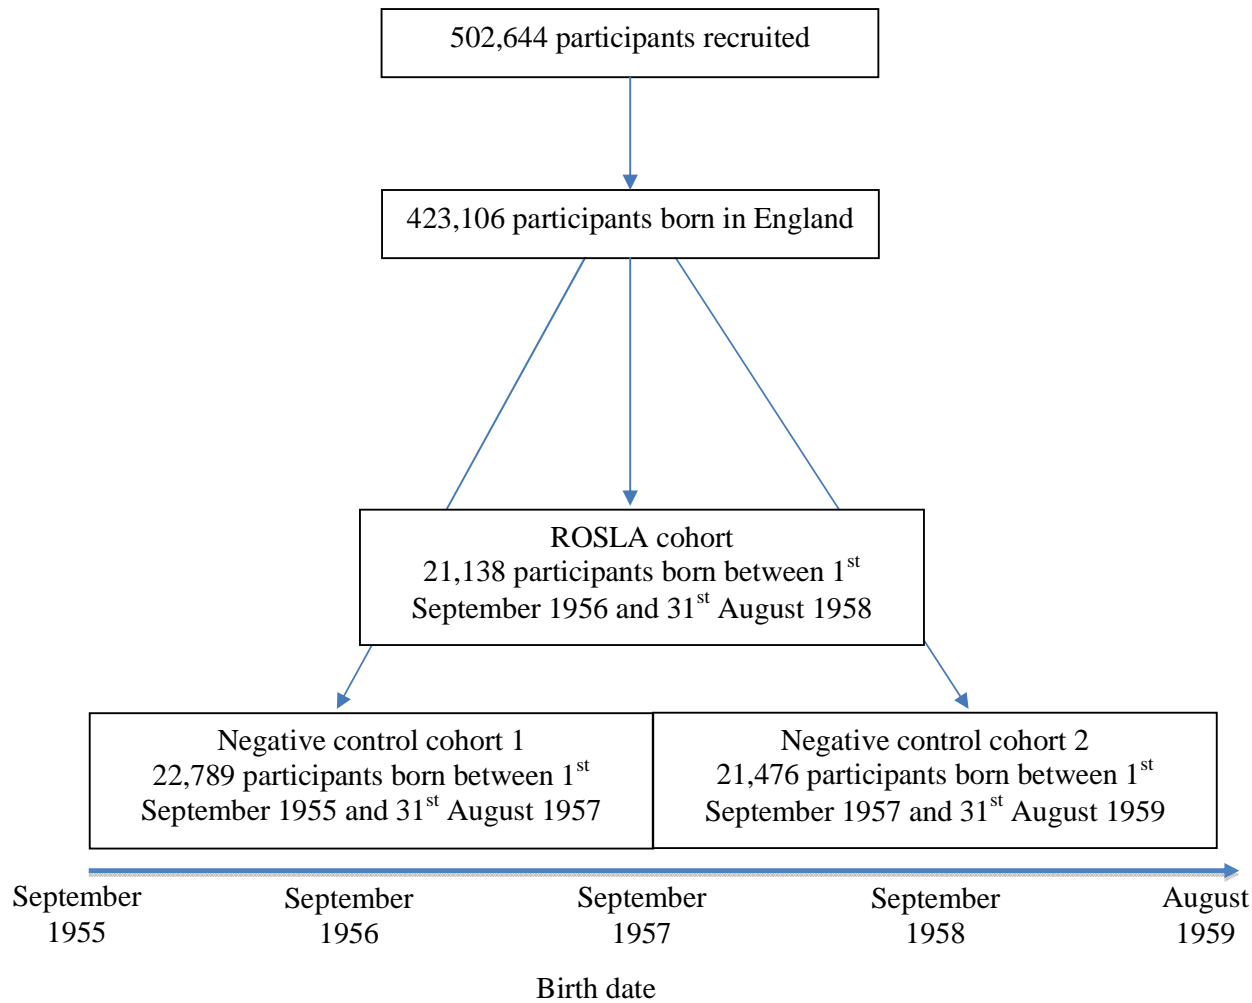

**Figure 2. Years of full-time education by quarter of birth.**

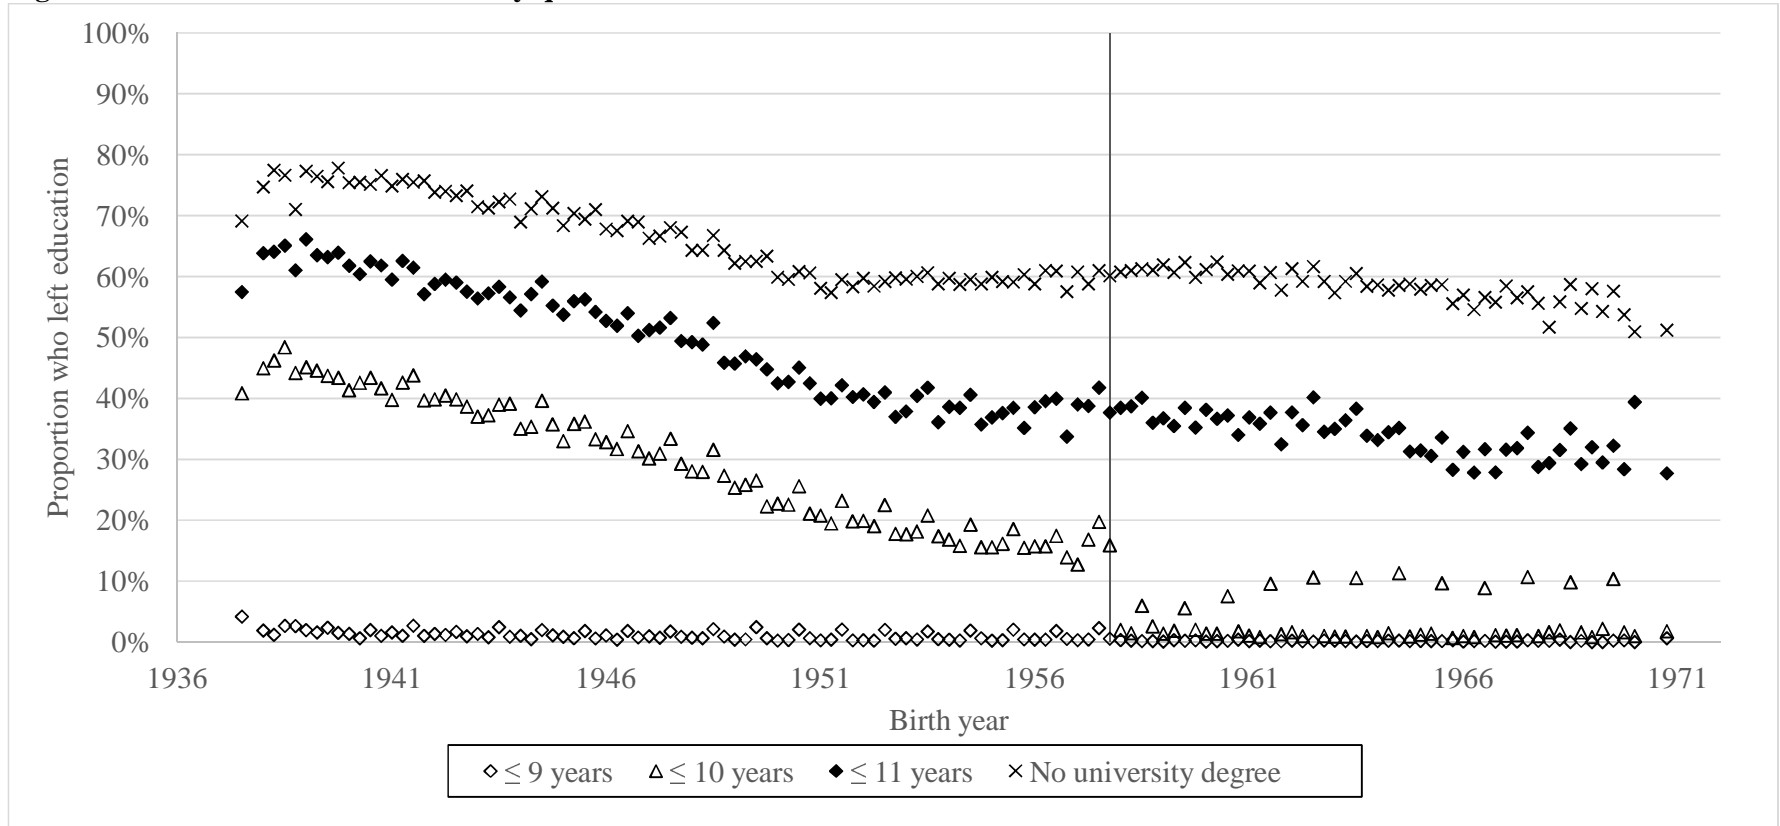

Notes: Each dot represents the proportion who left education before the given age per quarter. The black line indicates the first cohort of participants who were affected by the reform implemented in September 1972. These participants were born after in or after September 1957 and faced a minimum school leaving age of 16. This is a one year increase compared to those born before September 1957. The participants who did not have a university degree were asked, “What age did you leave full-time education?”. People who were born in the summer (July-August) were still able to leave school at age 15. N=384,743.



**Figure 3. Effects of the reform on the proportion of males staying in education after the age of 15.**

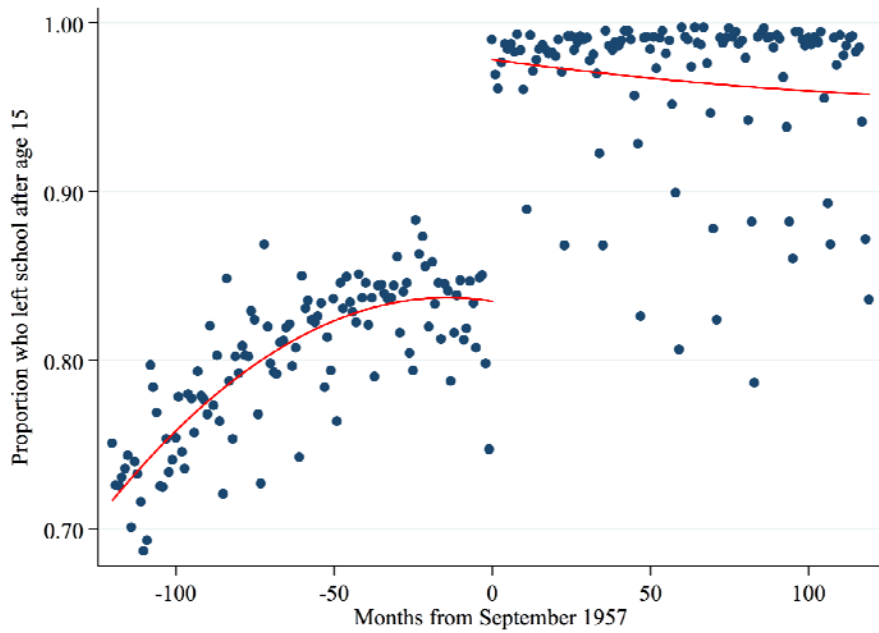

Notes: Each dot represents the proportion of males born in each month who stayed in school past the age of 15. N=176,931.

**Figure 4: Effects of the reform on the proportion of females staying in education after the age of 15.**

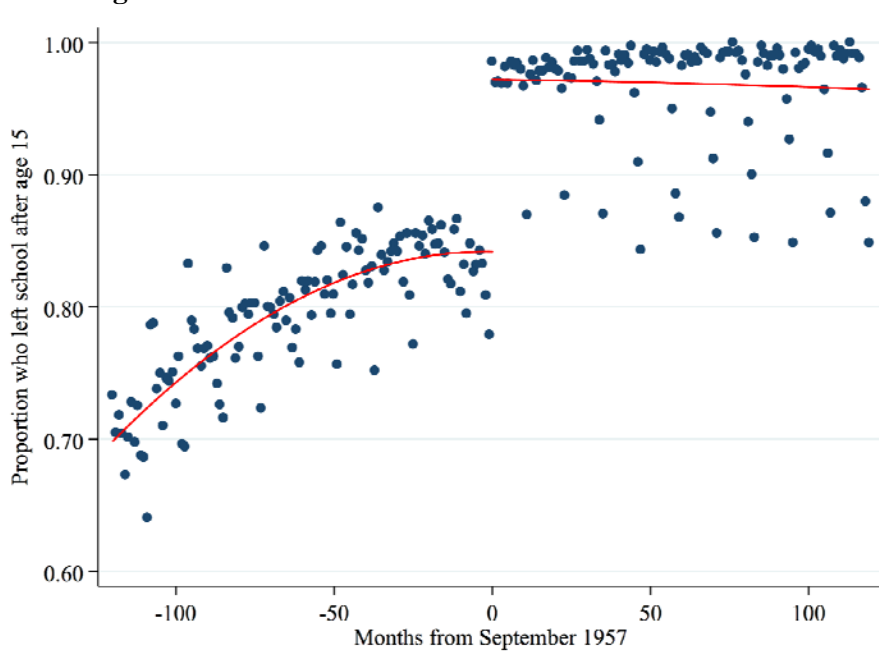

Notes: Each dot represents the proportion of females born in each month who stayed in school past the age of 15. N=207,812.

**Figure 5: Difference in risk of outcomes between those who left school after age 15. Estimated by actual education attainment (squares), and using the raising of the school-leaving age as an instrument (triangles).**

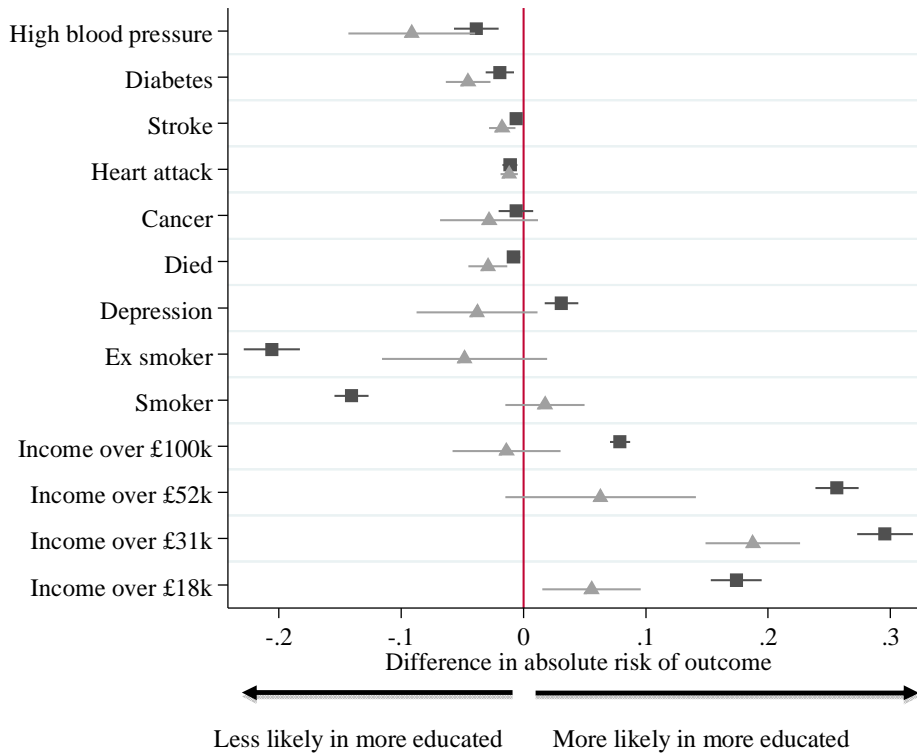

Notes: Results also displayed in Table 6. Estimated using robust linear regression, with standard errors clustered by month of birth. Max N=22,138.

**Figure 6: Difference in mean outcomes between those who left school after age 15. Estimated by actual education attainment (squares), and using the raising of the school-leaving age as an instrument (triangles).**

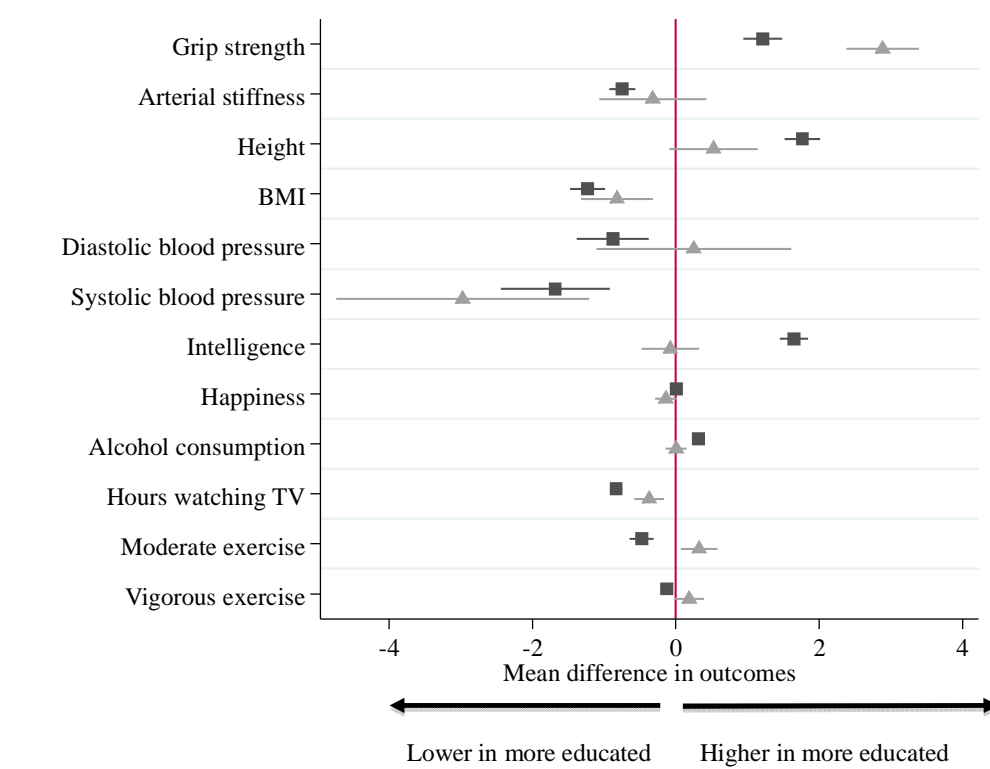

Notes: Results also displayed in Table 6. Estimated using robust linear regression, with standard errors clustered by month of birth. Max N=22,123.

**Table 1: Cohort of UK Biobank participants born between September 1956 and August 1958.**

|                                | N      | Count  | Proportion (%) |  |  |
|--------------------------------|--------|--------|----------------|--|--|
| Male                           | 22,138 | 9,699  | 43.8           |  |  |
| Mother smoked during pregnancy | 19,442 | 6,519  | 33.5           |  |  |
| Breastfed                      | 18,226 | 12,695 | 69.7           |  |  |
| Father alive                   | 21,618 | 8,198  | 37.9           |  |  |
| Mother alive                   | 21,822 | 13,388 | 61.4           |  |  |
| High blood pressure            | 21,768 | 3,978  | 18.3           |  |  |
| Diabetes                       | 22,049 | 661    | 3.0            |  |  |
| Stroke                         | 22,110 | 184    | 0.8            |  |  |
| Heart attack                   | 22,110 | 183    | 0.8            |  |  |
| Cancer                         | 22,011 | 1,813  | 8.2            |  |  |
| Died                           | 22,138 | 191    | 0.9            |  |  |
| Ever smoker                    | 22,086 | 8,899  | 40.3           |  |  |
| Current smoker                 | 22,086 | 2,602  | 11.8           |  |  |
| Income over £18k               | 19,921 | 17,398 | 87.3           |  |  |
| Income over £31k               | 19,921 | 13,532 | 67.9           |  |  |
| Income over £52k               | 19,921 | 7,524  | 37.8           |  |  |
| Income over £100k              | 19,921 | 1,638  | 8.2            |  |  |

  

|                                     | N      | Mean   | Standard deviation | Minimum | Maximum |
|-------------------------------------|--------|--------|--------------------|---------|---------|
| Birthweight (kg)                    | 14,860 | 3.32   | 0.63               | 0.57    | 7.26    |
| Number of brothers                  | 21,848 | 1.15   | 1.18               | 0.00    | 12.00   |
| Number of sisters                   | 21,851 | 1.06   | 1.13               | 0.00    | 14.00   |
| Genome-wide allele education score  | 7,005  | -0.01  | 0.97               | -4.37   | 3.48    |
| Grip strength (kg)                  | 21,989 | 1.49   | 10.85              | -30.66  | 46.46   |
| Arterial Stiffness                  | 8,537  | -0.32  | 3.04               | -8.34   | 83.63   |
| Height (cm)                         | 22,077 | 169.42 | 9.16               | 122.00  | 206.00  |
| BMI (kg/m <sup>2</sup> )            | 22,055 | 27.32  | 4.96               | 14.53   | 61.54   |
| Diastolic blood pressure (mmHg)     | 21,494 | 82.55  | 10.29              | 45.00   | 131.50  |
| Systolic blood pressure (mmHg)      | 21,492 | 133.50 | 16.82              | 84.00   | 268.00  |
| Intelligence (0 to 13)              | 8,540  | 6.34   | 2.10               | 0.00    | 13.00   |
| Happiness (0 to 5 Likert)           | 8,626  | 3.36   | 0.72               | 0.00    | 5.00    |
| Alcohol consumption (1 low, 5 high) | 22,123 | 3.14   | 1.42               | 0.00    | 5.00    |
| Hours watching television per day   | 21,206 | 2.63   | 1.59               | 0.00    | 24.00   |
| Moderate exercise (days/week)       | 21,330 | 3.46   | 2.34               | 0.00    | 7.00    |
| Vigorous exercise (days/week)       | 21,379 | 1.91   | 1.95               | 0.00    | 7.00    |

**Table 2: Baseline differences between students who left before and after age 15 (left) and differences between students who left school before and after the reform (right).**

| Independent variable:                | N      | Stayed on in school after age 15 |                         |        |         | ROSLA cohort vs. pre-ROSLA cohort |                         |       |         |
|--------------------------------------|--------|----------------------------------|-------------------------|--------|---------|-----------------------------------|-------------------------|-------|---------|
|                                      |        | Risk difference                  | 95% Confidence interval |        | P-value | Risk difference                   | 95% Confidence interval |       | P-value |
| Dependent variable:                  |        |                                  | Lower                   | Upper  |         |                                   | Lower                   | Upper |         |
| Male                                 | 22,138 | -0.003                           | -0.024                  | 0.019  | 0.79    | 0.000                             | -0.016                  | 0.016 | 0.98    |
| Mother smoked during pregnancy       | 19,442 | -0.161                           | -0.185                  | -0.137 | 1.5E-8  | -0.010                            | -0.024                  | 0.003 | 0.13    |
| Breastfed                            | 18,226 | 0.095                            | 0.074                   | 0.117  | 9.9E-7  | -0.014                            | -0.028                  | 0.001 | 0.07    |
| Father alive                         | 21,618 | 0.104                            | 0.084                   | 0.123  | 1.6E-7  | 0.043                             | 0.025                   | 0.061 | 2.9E-4  |
| Mother alive                         | 21,822 | 0.110                            | 0.089                   | 0.130  | 1.3E-7  | 0.037                             | 0.026                   | 0.048 | 1.2E-5  |
|                                      |        | Mean difference                  |                         |        |         | Mean difference                   |                         |       |         |
| Birthweight (kg)                     | 14,860 | 0.033                            | 0.000                   | 0.066  | 0.05    | 0.007                             | -0.019                  | 0.033 | 0.56    |
| Number of brothers                   | 21,848 | -0.507                           | -0.596                  | -0.419 | 6.9E-8  | -0.031                            | -0.077                  | 0.016 | 0.17    |
| Number of sisters                    | 21,851 | -0.405                           | -0.518                  | -0.292 | 7.4E-6  | 0.010                             | -0.031                  | 0.051 | 0.61    |
| Genome-wide education allele Z-score | 7,005  | 0.015                            | 0.011                   | 0.019  | 3.0E-6  | 0.001                             | -0.001                  | 0.002 | 0.22    |

Notes: ROSLA= Raising of the school leaving age. The results in the left hand columns present the association of staying on school after age 15 and the covariates in the two cohorts directly before and after the reform. The right columns present the differences in these covariates between participants who were born before immediately before and after the reform. Robust standard errors clustered by year and month of birth reported.

**Table 3: Association of the reform in two dummy control populations. First participants who attended school in the two years prior to the reforms (negative control sample 1, left), and in the two years after the reforms (negative control sample 2, right).**

| Independent variable:<br>Sample:     | Negative control sample 1 |                                                |                         |                                                 |         | Negative control sample 2 |                                                 |                         |        |         |
|--------------------------------------|---------------------------|------------------------------------------------|-------------------------|-------------------------------------------------|---------|---------------------------|-------------------------------------------------|-------------------------|--------|---------|
|                                      |                           | Sept 1955-August 1956 to Sept 1956-August 1957 |                         | Sept 1957- August 1958 to Sept 1958-August 1959 |         |                           | Sept 1957- August 1958 to Sept 1958-August 1959 |                         |        |         |
| Dependent variable:                  | N                         | Risk difference                                | 95% Confidence interval |                                                 | P-value | difference                | Risk difference                                 | 95% Confidence interval |        | P-value |
|                                      |                           |                                                | Lower                   | Upper                                           |         |                           |                                                 | Lower                   | Upper  |         |
| Male                                 | 22,789                    | 0.011                                          | 0.001                   | 0.022                                           | 0.04    | 21,476                    | 0.002                                           | -0.014                  | 0.019  | 0.75    |
| Mother smoked during pregnancy       | 19,992                    | -0.005                                         | -0.016                  | 0.005                                           | 0.29    | 18,893                    | -0.013                                          | -0.031                  | 0.005  | 0.14    |
| Breastfed                            | 18,674                    | -0.018                                         | -0.033                  | -0.003                                          | 0.02    | 17,748                    | -0.016                                          | -0.032                  | -0.001 | 0.04    |
| Father alive                         | 22,232                    | 0.025                                          | 0.013                   | 0.038                                           | 0.001   | 20,924                    | 0.041                                           | 0.027                   | 0.054  | 4.2E-5  |
| Mother alive                         | 22,447                    | 0.032                                          | 0.026                   | 0.039                                           | 2.8E-7  | 21,157                    | 0.032                                           | 0.019                   | 0.046  | 2.3E-4  |
|                                      |                           | Mean difference                                |                         |                                                 |         |                           | Mean difference                                 |                         |        |         |
| Birthweight (kg)                     | 14,970                    | 0.016                                          | -0.008                  | 0.040                                           | 0.17    | 14,591                    | 0.008                                           | -0.009                  | 0.025  | 0.33    |
| Number of brothers                   | 22,478                    | 0.025                                          | -0.017                  | 0.066                                           | 0.21    | 21,193                    | 0.018                                           | -0.005                  | 0.040  | 0.11    |
| Number of sisters                    | 22,478                    | -0.012                                         | -0.036                  | 0.011                                           | 0.28    | 21,195                    | 0.015                                           | -0.032                  | 0.062  | 0.49    |
| Genome-wide education allele Z-score | 7,134                     | 0.000                                          | -0.003                  | 0.003                                           | 0.88    | 6,702                     | 0.000                                           | -0.004                  | 0.003  | 0.89    |

Notes: The left hand columns compare the two cohorts immediately before the reform, and the right hand columns compare the two cohorts immediately after the reform. Robust standard errors clustered by year and the month of birth reported. Linear regression adjusted for month of birth and gender.

**Table 4: The associations between leaving school after age 15, and attending school after the raising of the school-leaving age (ROSLA) and outcomes.**

| Date of birth:                      | Left school after age 15 |                      |                         |        |         | ROSLA                 |                         |                       |         |         |
|-------------------------------------|--------------------------|----------------------|-------------------------|--------|---------|-----------------------|-------------------------|-----------------------|---------|---------|
|                                     | Sept 1955-August 1956    |                      | Sept 1956-August 1957   |        |         | Sept 1956-August 1957 |                         | Sept 1957-August 1958 |         | P-value |
|                                     | N                        | Risk/Mean difference | 95% Confidence interval |        | P-value | Risk/Mean difference  | 95% Confidence interval |                       |         |         |
|                                     |                          | Lower                | Upper                   |        |         | Lower                 | Upper                   |                       |         |         |
| High blood pressure                 | 21,768                   | -0.039               | -0.057                  | -0.020 | 2.5E-4  | -0.013                | -0.021                  | -0.005                | 0.003   |         |
| Diabetes                            | 22,049                   | -0.019               | -0.031                  | -0.008 | 0.002   | -0.007                | -0.009                  | -0.004                | 4.6E-5  |         |
| Stroke                              | 22,110                   | -0.006               | -0.011                  | -0.002 | 0.01    | -0.003                | -0.004                  | -0.001                | 0.007   |         |
| Heart attack                        | 22,110                   | -0.011               | -0.017                  | -0.005 | 0.001   | -0.002                | -0.003                  | -0.001                | 0.005   |         |
| Depression                          | 21,085                   | 0.031                | 0.017                   | 0.045  | 1.1E-4  | -0.005                | -0.013                  | 0.002                 | 0.15    |         |
| Cancer                              | 22,011                   | -0.006               | -0.020                  | 0.008  | 0.39    | -0.004                | -0.010                  | 0.002                 | 0.20    |         |
| Died                                | 22,138                   | -0.008               | -0.013                  | -0.003 | 0.005   | -0.004                | -0.007                  | -0.002                | 0.002   |         |
| Ever smoked                         | 22,086                   | -0.206               | -0.228                  | -0.183 | 2.3E-15 | -0.007                | -0.017                  | 0.003                 | 0.18    |         |
| Current smoker                      | 22,086                   | -0.141               | -0.155                  | -0.127 | 1.9E-16 | 0.003                 | -0.002                  | 0.008                 | 0.30    |         |
| Income over £18k                    | 19,921                   | 0.174                | 0.153                   | 0.195  | 1.2E-14 | 0.008                 | 0.002                   | 0.013                 | 0.01    |         |
| Income over £31k                    | 19,921                   | 0.295                | 0.273                   | 0.318  | 7.1E-19 | 0.025                 | 0.020                   | 0.031                 | 2.4E-9  |         |
| Income over £52k                    | 19,921                   | 0.256                | 0.239                   | 0.274  | 4.7E-20 | 0.009                 | -0.003                  | 0.020                 | 0.14    |         |
| Income over £100k                   | 19,921                   | 0.079                | 0.071                   | 0.087  | 4.3E-16 | -0.002                | -0.008                  | 0.005                 | 0.56    |         |
| Grip strength (kg)                  | 21,989                   | 1.213                | 0.943                   | 1.482  | 2.9E-9  | 0.414                 | 0.339                   | 0.488                 | 5.3E-11 |         |
| Arterial Stiffness                  | 8,537                    | -0.747               | -0.929                  | -0.564 | 1.6E-8  | -0.043                | -0.149                  | 0.064                 | 0.42    |         |
| Height (cm)                         | 22,077                   | 1.766                | 1.516                   | 2.016  | 4.0E-13 | 0.076                 | -0.020                  | 0.172                 | 0.11    |         |
| BMI (kg/m <sup>2</sup> )            | 22,055                   | -1.232               | -1.478                  | -0.986 | 3.8E-10 | -0.119                | -0.195                  | -0.042                | 0.004   |         |
| Diastolic blood pressure (mmHg)     | 21,494                   | -0.877               | -1.379                  | -0.376 | 0.001   | 0.036                 | -0.176                  | 0.247                 | 0.73    |         |
| Systolic blood pressure (mmHg)      | 21,492                   | -1.684               | -2.445                  | -0.923 | 1.3E-4  | -0.427                | -0.704                  | -0.150                | 0.004   |         |
| Intelligence (0 to 13)              | 8,540                    | 1.648                | 1.448                   | 1.848  | 1.5E-14 | -0.010                | -0.067                  | 0.046                 | 0.71    |         |
| Happiness (0 to 5 Likert)           | 8,626                    | 0.007                | -0.048                  | 0.062  | 0.79    | -0.018                | -0.040                  | 0.004                 | 0.10    |         |
| Alcohol consumption (1 low, 5 high) | 22,123                   | 0.314                | 0.224                   | 0.404  | 2.3E-7  | 0.001                 | -0.022                  | 0.024                 | 0.95    |         |
| Hours watching television           | 21,206                   | -0.833               | -0.916                  | -0.749 | 2.7E-16 | -0.054                | -0.088                  | -0.021                | 0.002   |         |
| Moderate exercise (days/week)       | 21,330                   | -0.476               | -0.643                  | -0.309 | 5.1E-6  | 0.045                 | 0.007                   | 0.083                 | 0.02    |         |
| Vigorous exercise (days/week)       | 21,379                   | -0.127               | -0.207                  | -0.047 | 0.003   | 0.026                 | -0.005                  | 0.056                 | 0.10    |         |

Notes: \* denotes risk differences. ROSLA= Raising of the school leaving age. Estimated using robust linear regression, with standard errors clustered by year and month of birth. All estimates adjust for the month of birth and sex. The same sample was used for both the conventional linear regression and ROSLA analyses.



**Table 5: Associations of outcomes and the raising of the school-leaving age in two negative control samples.**

| Date of birth:                      | Negative control sample 1                      |                      |                         |        |         | Negative control sample 2                       |                      |                         |        |         |
|-------------------------------------|------------------------------------------------|----------------------|-------------------------|--------|---------|-------------------------------------------------|----------------------|-------------------------|--------|---------|
|                                     | Sept 1955-August 1956 to Sept 1956-August 1957 |                      |                         |        |         | Sept 1957- August 1958 to Sept 1958-August 1959 |                      |                         |        |         |
|                                     | N                                              | Risk/Mean difference | 95% Confidence interval |        | P-value | N                                               | Risk/Mean difference | 95% Confidence interval |        | P-value |
|                                     |                                                | Lower                | Upper                   |        |         |                                                 | Lower                | Upper                   |        |         |
| High blood pressure                 | 22,404                                         | -0.010               | -0.017                  | -0.004 | 0.004   | 21,153                                          | -0.015               | -0.023                  | -0.006 | 0.001   |
| Diabetes                            | 22,685                                         | -0.001               | -0.003                  | 0.001  | 0.49    | 21,376                                          | -0.002               | -0.005                  | 0.001  | 0.25    |
| Stroke                              | 22,756                                         | 0.000                | -0.001                  | 0.002  | 0.49    | 21,452                                          | -0.001               | -0.003                  | 0.001  | 0.37    |
| Heart attack                        | 22,756                                         | -0.002               | -0.004                  | 0.000  | 0.04    | 21,452                                          | 0.002                | 0.000                   | 0.004  | 0.04    |
| Depression                          | 21,658                                         | 0.012                | 0.004                   | 0.019  | 0.004   | 20,428                                          | -0.004               | -0.009                  | 0.002  | 0.18    |
| Cancer                              | 22,670                                         | -0.005               | -0.011                  | 0.000  | 0.07    | 21,334                                          | -0.007               | -0.013                  | -0.001 | 0.03    |
| Died                                | 22,789                                         | 0.002                | -0.001                  | 0.004  | 0.16    | 21,476                                          | 0.001                | 0.000                   | 0.002  | 0.14    |
| Ever smoked                         | 22,728                                         | -0.011               | -0.023                  | 0.001  | 0.07    | 21,436                                          | -0.001               | -0.012                  | 0.010  | 0.88    |
| Current smoker                      | 22,728                                         | 0.000                | -0.007                  | 0.007  | 0.97    | 21,436                                          | 0.004                | -0.005                  | 0.012  | 0.34    |
| Income over £18k                    | 20,431                                         | 0.006                | -0.001                  | 0.014  | 0.07    | 19,366                                          | 0.001                | -0.006                  | 0.008  | 0.75    |
| Income over £31k                    | 20,431                                         | 0.001                | -0.010                  | 0.011  | 0.89    | 19,366                                          | 0.003                | -0.004                  | 0.011  | 0.35    |
| Income over £52k                    | 20,431                                         | 0.004                | -0.006                  | 0.015  | 0.41    | 19,366                                          | 0.005                | -0.005                  | 0.015  | 0.34    |
| Income over £100k                   | 20,431                                         | 0.004                | -0.002                  | 0.010  | 0.19    | 19,366                                          | 0.003                | -0.002                  | 0.008  | 0.18    |
| Grip strength (kg)                  | 22,635                                         | 0.131                | -0.005                  | 0.268  | 0.06    | 21,336                                          | 0.131                | -0.028                  | 0.291  | 0.10    |
| Arterial Stiffness                  | 8,764                                          | -0.243               | -0.349                  | -0.138 | 8.2E-5  | 8,153                                           | -0.188               | -0.265                  | -0.111 | 4.1E-5  |
| Height (cm)                         | 22,727                                         | 0.084                | -0.040                  | 0.208  | 0.18    | 21,422                                          | 0.161                | 0.053                   | 0.270  | 0.005   |
| BMI (kg/m <sup>2</sup> )            | 22,693                                         | -0.034               | -0.128                  | 0.061  | 0.47    | 21,411                                          | -0.041               | -0.142                  | 0.060  | 0.41    |
| Diastolic blood pressure (mmHg)     | 22,101                                         | -0.288               | -0.517                  | -0.059 | 0.02    | 20,829                                          | -0.310               | -0.525                  | -0.095 | 0.007   |
| Systolic blood pressure (mmHg)      | 22,099                                         | -0.904               | -1.242                  | -0.567 | 1.2E-5  | 20,829                                          | -0.636               | -0.864                  | -0.409 | 6.8E-6  |
| Intelligence (0 to 13)              | 8,755                                          | -0.076               | -0.146                  | -0.006 | 0.03    | 8,163                                           | -0.063               | -0.129                  | 0.002  | 0.06    |
| Happiness (0 to 5 Likert)           | 8,847                                          | 0.008                | -0.016                  | 0.032  | 0.50    | 8,227                                           | -0.008               | -0.028                  | 0.012  | 0.44    |
| Alcohol consumption (1 low, 5 high) | 22,778                                         | -0.012               | -0.034                  | 0.010  | 0.28    | 21,461                                          | -0.030               | -0.054                  | -0.005 | 0.02    |
| Hours watching TV                   | 21,868                                         | 0.000                | -0.034                  | 0.034  | 0.99    | 20,559                                          | -0.054               | -0.089                  | -0.019 | 0.004   |
| Moderate exercise (days/week)       | 21,958                                         | 0.019                | -0.021                  | 0.058  | 0.34    | 20,729                                          | -0.040               | -0.089                  | 0.008  | 0.10    |
| Vigorous exercise (days/week)       | 21,994                                         | 0.063                | 0.031                   | 0.095  | 5.1E-4  | 20,830                                          | 0.066                | 0.036                   | 0.096  | 1.3E-4  |

Notes: Estimated using robust linear regression, with standard errors clustered by year and month of birth. All estimates adjust for the month of birth and sex.

**Table 6: The effects of leaving school after age 15, instrumental variable regression (left) and conventional regression (right)**

|                                     | N      | Instrumental variable regression |                         |        |          | Conventional linear regression |                |                      |                         |        |
|-------------------------------------|--------|----------------------------------|-------------------------|--------|----------|--------------------------------|----------------|----------------------|-------------------------|--------|
|                                     |        | Risk/Mean difference             | 95% Confidence interval |        | P-value  | Hausman p-value                | Partial F-stat | Risk/Mean difference | 95% Confidence interval |        |
|                                     |        |                                  | Lower                   | Upper  |          |                                |                |                      | Lower                   | Upper  |
| High blood pressure                 | 21,768 | -0.091                           | -0.143                  | -0.040 | 5.5E-4*  | 0.08                           | 1327           | -0.039               | -0.057                  | -0.020 |
| Diabetes                            | 22,049 | -0.045                           | -0.063                  | -0.027 | 9.7E-7*  | 0.02                           | 1318           | -0.019               | -0.031                  | -0.008 |
| Stroke                              | 22,110 | -0.017                           | -0.028                  | -0.006 | 0.002*   | 0.10                           | 1327           | -0.006               | -0.011                  | -0.002 |
| Heart attack                        | 22,110 | -0.012                           | -0.019                  | -0.004 | 0.001*   | 0.87                           | 1327           | -0.011               | -0.017                  | -0.005 |
| Depression                          | 21,085 | -0.038                           | -0.087                  | 0.012  | 0.13     | 0.01                           | 1221           | 0.031                | 0.017                   | 0.045  |
| Cancer                              | 22,011 | -0.028                           | -0.068                  | 0.012  | 0.17     | 0.30                           | 1315           | -0.006               | -0.020                  | 0.008  |
| Died                                | 22,138 | -0.029                           | -0.045                  | -0.013 | 3.4E-4*  | 0.009                          | 1330           | -0.008               | -0.013                  | -0.003 |
| Ever smoked                         | 22,086 | -0.048                           | -0.116                  | 0.019  | 0.16     | 0.001                          | 1327           | -0.206               | -0.228                  | -0.183 |
| Current smoker                      | 22,086 | 0.018                            | -0.015                  | 0.050  | 0.28     | 2.0E-5                         | 1327           | -0.141               | -0.155                  | -0.127 |
| Income over £18k                    | 19,921 | 0.056                            | 0.015                   | 0.096  | 0.007*   | 0.001                          | 1112           | 0.174                | 0.154                   | 0.194  |
| Income over £31k                    | 19,921 | 0.188                            | 0.149                   | 0.226  | 1.7E-21* | 0.001                          | 1112           | 0.295                | 0.267                   | 0.323  |
| Income over £52k                    | 19,921 | 0.063                            | -0.015                  | 0.141  | 0.11     | 6.3E-4                         | 1112           | 0.256                | 0.237                   | 0.275  |
| Income over £100k                   | 19,921 | -0.014                           | -0.058                  | 0.030  | 0.54     | 0.002                          | 1112           | 0.079                | 0.070                   | 0.088  |
| Grip strength (kg)                  | 21,989 | 2.885                            | 2.381                   | 3.390  | 3.6E-29* | 3.1E-4                         | 1302           | 1.213                | 0.943                   | 1.482  |
| Arterial Stiffness                  | 8,537  | -0.323                           | -1.067                  | 0.422  | 0.40     | 0.27                           | 469            | -0.747               | -0.929                  | -0.564 |
| Height (cm)                         | 22,077 | 0.527                            | -0.088                  | 1.143  | 0.09     | 0.002                          | 1324           | 1.766                | 1.516                   | 2.016  |
| BMI (kg/m <sup>2</sup> )            | 22,055 | -0.820                           | -1.323                  | -0.316 | 0.001*   | 0.18                           | 1324           | -1.232               | -1.478                  | -0.986 |
| Diastolic blood pressure (mmHg)     | 21,494 | 0.249                            | -1.110                  | 1.607  | 0.72     | 0.10                           | 1275           | -0.877               | -1.379                  | -0.376 |
| Systolic blood pressure (mmHg)      | 21,492 | -2.975                           | -4.740                  | -1.209 | 9.6E-4*  | 0.11                           | 1274           | -1.684               | -2.445                  | -0.923 |
| Intelligence (0 to 13)              | 8,540  | -0.078                           | -0.482                  | 0.326  | 0.71     | 1.1E-5                         | 469            | 1.648                | 1.448                   | 1.848  |
| Happiness (0 to 5 Likert)           | 8,626  | -0.139                           | -0.290                  | 0.012  | 0.07     | 0.08                           | 480            | 0.007                | -0.048                  | 0.062  |
| Alcohol consumption (1 low, 5 high) | 22,123 | 0.005                            | -0.143                  | 0.153  | 0.95     | 0.002                          | 1329           | 0.314                | 0.224                   | 0.404  |
| Hours watching TV                   | 21,206 | -0.372                           | -0.577                  | -0.167 | 3.8E-4*  | 0.001                          | 1292           | -0.833               | -0.916                  | -0.749 |
| Moderate exercise (days/week)       | 21,330 | 0.327                            | 0.073                   | 0.581  | 0.01*    | 3.0E-4                         | 1211           | -0.476               | -0.643                  | -0.309 |
| Vigorous exercise (days/week)       | 21,379 | 0.186                            | -0.022                  | 0.395  | 0.08     | 0.02                           | 1205           | -0.127               | -0.207                  | -0.047 |

Notes: Estimated using robust linear regression, with standard errors clustered by year and month of birth. All estimates adjust for the month of birth and sex. \* Exceeds Benjamini and Hochberg (1995) corrected threshold for false discovery rate at  $\delta=0.05$  across 25 outcomes.(28)

**Table S1: The associations between leaving school after age 15, and attending school after the raising of the school leaving age (ROSLA) and outcomes for MALES.**

| Date of birth:                  | Left school after age 15 |                      |                          |        |         | ROSLA                 |                         |                          |         |
|---------------------------------|--------------------------|----------------------|--------------------------|--------|---------|-----------------------|-------------------------|--------------------------|---------|
|                                 | Sept 1955-August 1956    |                      | to Sept 1956-August 1957 |        |         | Sept 1956-August 1957 |                         | to Sept 1957-August 1958 |         |
|                                 | N                        | Mean/risk difference | 95% Confidence interval  |        | P-value | Mean/risk difference  | 95% Confidence interval |                          | P-value |
|                                 |                          | Lower                | Upper                    |        |         | Lower                 | Upper                   |                          |         |
| High blood pressure*            | 9,554                    | -0.043               | -0.073                   | -0.014 | 0.006   | -0.015                | -0.022                  | -0.007                   | <0.001  |
| Diabetes*                       | 9,650                    | -0.035               | -0.056                   | -0.014 | 0.002   | -0.009                | -0.013                  | -0.004                   | <0.001  |
| Stroke*                         | 9,684                    | -0.005               | -0.013                   | 0.002  | 0.17    | -0.001                | -0.004                  | 0.001                    | 0.32    |
| Heart attack*                   | 9,684                    | -0.018               | -0.029                   | -0.008 | 0.001   | -0.001                | -0.003                  | 0.001                    | 0.37    |
| Depression*                     | 9,376                    | 0.022                | -0.002                   | 0.046  | 0.07    | -0.008                | -0.022                  | 0.006                    | 0.28    |
| Cancer*                         | 9,681                    | -0.006               | -0.017                   | 0.006  | 0.32    | -0.005                | -0.011                  | 0.000                    | 0.06    |
| Died*                           | 9,699                    | -0.014               | -0.023                   | -0.004 | 0.009   | -0.007                | -0.010                  | -0.003                   | <0.001  |
| Ex-smoker*                      | 9,681                    | -0.222               | -0.246                   | -0.198 | <0.001  | -0.010                | -0.030                  | 0.011                    | 0.34    |
| Current smoker*                 | 9,681                    | -0.171               | -0.195                   | -0.146 | <0.001  | 0.002                 | -0.006                  | 0.009                    | 0.61    |
| Income over £100k*              | 8,904                    | 0.090                | 0.079                    | 0.101  | <0.001  | 0.000                 | -0.006                  | 0.007                    | 0.93    |
| Income over £52k*               | 8,904                    | 0.276                | 0.242                    | 0.310  | <0.001  | 0.009                 | -0.008                  | 0.026                    | 0.29    |
| Income over £31k*               | 8,904                    | 0.301                | 0.261                    | 0.341  | <0.001  | 0.036                 | 0.028                   | 0.043                    | <0.001  |
| Income over £18k*               | 8,904                    | 0.146                | 0.117                    | 0.175  | <0.001  | 0.012                 | 0.003                   | 0.021                    | 0.01    |
| Grip strength (kg)              | 9,618                    | 0.850                | 0.184                    | 1.516  | 0.01    | 0.521                 | 0.337                   | 0.705                    | <0.001  |
| Arterial Stiffness              | 3,674                    | -1.024               | -1.357                   | -0.692 | <0.001  | -0.113                | -0.250                  | 0.024                    | 0.10    |
| Height (cm)                     | 9,666                    | 1.789                | 1.405                    | 2.174  | <0.001  | 0.167                 | -0.030                  | 0.364                    | 0.09    |
| BMI (kg/m <sup>2</sup> )        | 9,656                    | -0.979               | -1.328                   | -0.631 | <0.001  | -0.082                | -0.232                  | 0.068                    | 0.27    |
| Diastolic blood pressure (mmHg) | 9,405                    | -0.667               | -1.656                   | 0.321  | 0.18    | -0.103                | -0.400                  | 0.194                    | 0.48    |
| Systolic blood pressure (mmHg)  | 9,404                    | -0.853               | -2.237                   | 0.530  | 0.21    | -0.359                | -0.775                  | 0.057                    | 0.09    |
| Intelligence (0 to 13)          | 3,644                    | 1.790                | 1.431                    | 2.149  | <0.001  | -0.010                | -0.121                  | 0.100                    | 0.85    |
| Happiness (0 to 5 Likert)       | 3,687                    | -0.026               | -0.131                   | 0.080  | 0.62    | -0.021                | -0.055                  | 0.013                    | 0.22    |
| Alcohol consumption             | 9,692                    | 0.292                | 0.174                    | 0.411  | <0.001  | 0.016                 | -0.015                  | 0.047                    | 0.30    |
| Hours watching TV               | 9,334                    | -0.881               | -0.983                   | -0.778 | <0.001  | -0.074                | -0.117                  | -0.030                   | 0.002   |
| Moderate exercise (days/week)   | 9,421                    | -0.670               | -0.880                   | -0.461 | <0.001  | 0.084                 | 0.019                   | 0.150                    | 0.01    |
| Vigorous exercise (days/week)   | 9,395                    | -0.276               | -0.415                   | -0.138 | <0.001  | 0.045                 | -0.012                  | 0.101                    | 0.12    |

Notes: \* denotes risk differences. Estimated using robust linear regression, with standard errors clustered by year and month of birth. All estimates adjust for month of birth and sex.

**Table S2: The associations between leaving school after age 15, and attending school after the raising of the school leaving age (ROSLA) and outcomes for FEMALES.**

| Date of birth:                  | Left school after age 15 |                      |                               |        |         | ROSLA                 |                               |                       |         |
|---------------------------------|--------------------------|----------------------|-------------------------------|--------|---------|-----------------------|-------------------------------|-----------------------|---------|
|                                 | Sept 1955-August 1956    |                      | Sept 1956-August 1957         |        |         | Sept 1956-August 1957 |                               | Sept 1957-August 1958 |         |
|                                 | N                        | Mean/risk difference | 95% Confidence interval Lower | Upper  | P-value | Mean/risk difference  | 95% Confidence interval Lower | Upper                 | P-value |
| High blood pressure*            | 12,214                   | -0.035               | -0.054                        | -0.015 | 0.001   | -0.012                | -0.025                        | 0.002                 | 0.09    |
| Diabetes*                       | 12,399                   | -0.007               | -0.015                        | 0.001  | 0.08    | -0.005                | -0.008                        | -0.002                | 0.003   |
| Stroke*                         | 12,426                   | -0.007               | -0.012                        | -0.001 | 0.02    | -0.003                | -0.005                        | -0.002                | <0.001  |
| Heart attack*                   | 12,426                   | -0.005               | -0.009                        | 0.000  | 0.03    | -0.002                | -0.004                        | -0.001                | <0.001  |
| Depression*                     | 11,709                   | 0.038                | 0.022                         | 0.054  | <0.001  | -0.004                | -0.015                        | 0.007                 | 0.50    |
| Cancer*                         | 12,330                   | -0.006               | -0.025                        | 0.012  | 0.50    | -0.003                | -0.011                        | 0.005                 | 0.43    |
| Died*                           | 12,439                   | -0.004               | -0.008                        | 0.001  | 0.12    | -0.002                | -0.005                        | 0.001                 | 0.11    |
| Ex-smoker*                      | 12,405                   | -0.192               | -0.227                        | -0.157 | <0.001  | -0.004                | -0.013                        | 0.004                 | 0.30    |
| Current smoker*                 | 12,405                   | -0.116               | -0.134                        | -0.099 | <0.001  | 0.003                 | -0.003                        | 0.010                 | 0.29    |
| Income over £100k*              | 11,017                   | 0.070                | 0.059                         | 0.081  | <0.001  | -0.003                | -0.014                        | 0.007                 | 0.53    |
| Income over £52k*               | 11,017                   | 0.240                | 0.222                         | 0.258  | <0.001  | 0.009                 | -0.002                        | 0.021                 | 0.12    |
| Income over £31k*               | 11,017                   | 0.290                | 0.255                         | 0.326  | <0.001  | 0.018                 | 0.011                         | 0.025                 | <0.001  |
| Income over £18k*               | 11,017                   | 0.196                | 0.164                         | 0.228  | <0.001  | 0.004                 | -0.004                        | 0.012                 | 0.32    |
| Grip strength (kg)              | 12,371                   | 1.501                | 1.167                         | 1.836  | <0.001  | 0.336                 | 0.189                         | 0.482                 | <0.001  |
| Arterial Stiffness              | 4,863                    | -0.550               | -0.759                        | -0.341 | <0.001  | 0.000                 | -0.127                        | 0.127                 | 1.00    |
| Height (cm)                     | 12,411                   | 1.756                | 1.403                         | 2.110  | <0.001  | 0.008                 | -0.091                        | 0.106                 | 0.87    |
| BMI (kg/m <sup>2</sup> )        | 12,399                   | -1.425               | -1.761                        | -1.088 | <0.001  | -0.146                | -0.304                        | 0.011                 | 0.07    |
| Diastolic blood pressure (mmHg) | 12,089                   | -1.054               | -1.540                        | -0.568 | <0.001  | 0.140                 | -0.211                        | 0.492                 | 0.42    |
| Systolic blood pressure (mmHg)  | 12,088                   | -2.345               | -3.267                        | -1.424 | <0.001  | -0.480                | -0.964                        | 0.003                 | 0.05    |
| Intelligence (0 to 13)          | 4,896                    | 1.546                | 1.351                         | 1.740  | <0.001  | -0.011                | -0.091                        | 0.070                 | 0.79    |
| Happiness (0 to 5 Likert)       | 4,939                    | 0.031                | -0.034                        | 0.097  | 0.33    | -0.016                | -0.042                        | 0.010                 | 0.21    |
| Alcohol consumption             | 12,431                   | 0.328                | 0.240                         | 0.416  | <0.001  | -0.011                | -0.057                        | 0.035                 | 0.62    |
| Hours watching TV               | 11,872                   | -0.796               | -0.912                        | -0.679 | <0.001  | -0.041                | -0.081                        | 0.000                 | 0.05    |
| Moderate exercise (days/wk)     | 11,909                   | -0.317               | -0.493                        | -0.141 | 0.001   | 0.014                 | -0.056                        | 0.083                 | 0.69    |
| Vigorous exercise (days/wk)     | 11,984                   | -0.007               | -0.131                        | 0.116  | 0.90    | 0.009                 | -0.033                        | 0.051                 | 0.67    |

Notes: \* denotes risk differences. Estimated using robust linear regression, with standard errors clustered by year and month of birth. All estimates adjust for month of birth and sex.

**Table S3: Heterogeneity in the effect of reform on outcomes by likelihood of staying in school. The effect of the reform on those who were predicted to leave at age 15 is indicated in the “leave” rows. The effect on those who were predicted to leave is the sum of the coefficients.**

|                     | Predicted | N     | Mean difference | 95% Confidence interval |        | P-value |
|---------------------|-----------|-------|-----------------|-------------------------|--------|---------|
|                     | to        |       |                 | Lower                   | Upper  |         |
| High blood pressure | Leave     | 21768 | 0.049           | -0.014                  | 0.113  | 0.123   |
|                     | Stay      | 21768 | -0.073          | -0.145                  | -0.001 | 0.047   |
| Diabetes            | Leave     | 22049 | -0.034          | -0.060                  | -0.009 | 0.011   |
|                     | Stay      | 22049 | 0.033           | 0.000                   | 0.065  | 0.048   |
| Stroke              | Leave     | 22110 | 0.014           | 0.003                   | 0.025  | 0.015   |
|                     | Stay      | 22110 | -0.020          | -0.033                  | -0.007 | 0.004   |
| Heart attack        | Leave     | 22110 | -0.008          | -0.024                  | 0.009  | 0.350   |
|                     | Stay      | 22110 | 0.007           | -0.013                  | 0.028  | 0.473   |
| Depression          | Leave     | 21085 | -0.017          | -0.061                  | 0.028  | 0.448   |
|                     | Stay      | 21085 | 0.013           | -0.040                  | 0.066  | 0.612   |
| Cancer              | Leave     | 22011 | -0.010          | -0.037                  | 0.017  | 0.439   |
|                     | Stay      | 22011 | 0.007           | -0.026                  | 0.041  | 0.657   |
| Died                | Leave     | 22138 | 0.008           | -0.008                  | 0.024  | 0.331   |
|                     | Stay      | 22138 | -0.014          | -0.032                  | 0.004  | 0.124   |
| Ever smoked         | Leave     | 22086 | 0.058           | -0.009                  | 0.126  | 0.087   |
|                     | Stay      | 22086 | -0.076          | -0.154                  | 0.002  | 0.056   |
| Current smoker      | Leave     | 22086 | -0.032          | -0.095                  | 0.031  | 0.308   |
|                     | Stay      | 22086 | 0.042           | -0.033                  | 0.116  | 0.263   |
| Income over £18k    | Leave     | 19921 | -0.014          | -0.049                  | 0.020  | 0.401   |
|                     | Stay      | 19921 | 0.013           | -0.034                  | 0.060  | 0.560   |
| Income over £31k    | Leave     | 19921 | 0.081           | 0.003                   | 0.159  | 0.043   |
|                     | Stay      | 19921 | -0.089          | -0.183                  | 0.004  | 0.061   |
| Income over £52k    | Leave     | 19921 | 0.055           | -0.034                  | 0.145  | 0.212   |
|                     | Stay      | 19921 | -0.039          | -0.143                  | 0.065  | 0.446   |

|                                     | Predicted to | N     | Mean difference | 95% Confidence interval |        | P-value |
|-------------------------------------|--------------|-------|-----------------|-------------------------|--------|---------|
|                                     |              |       |                 | Lower                   | Upper  |         |
| Income over £100k                   | Leave        | 19921 | 0.053           | -0.026                  | 0.132  | 0.179   |
|                                     | Stay         | 19921 | -0.056          | -0.150                  | 0.038  | 0.229   |
| Grip strength (kg)                  | Leave        | 21989 | 1.382           | 0.445                   | 2.320  | 0.006   |
|                                     | Stay         | 21989 | -1.162          | -2.268                  | -0.056 | 0.040   |
| Arterial Stiffness                  | Leave        | 8537  | 0.478           | -0.312                  | 1.269  | 0.223   |
|                                     | Stay         | 8537  | -0.604          | -1.530                  | 0.323  | 0.191   |
| Height (cm)                         | Leave        | 22077 | -0.817          | -1.855                  | 0.221  | 0.117   |
|                                     | Stay         | 22077 | 1.004           | -0.166                  | 2.174  | 0.089   |
| BMI (kg/m <sup>2</sup> )            | Leave        | 22055 | -0.753          | -1.588                  | 0.083  | 0.075   |
|                                     | Stay         | 22055 | 0.764           | -0.193                  | 1.721  | 0.112   |
| Diastolic blood pressure (mmHg)     | Leave        | 21494 | 0.121           | -1.442                  | 1.685  | 0.874   |
|                                     | Stay         | 21494 | -0.073          | -1.923                  | 1.778  | 0.936   |
| Systolic blood pressure (mmHg)      | Leave        | 21492 | -0.568          | -4.090                  | 2.954  | 0.742   |
|                                     | Stay         | 21492 | 0.213           | -3.811                  | 4.238  | 0.914   |
| Intelligence (0 to 13)              | Leave        | 8540  | -0.258          | -0.704                  | 0.188  | 0.243   |
|                                     | Stay         | 8540  | 0.273           | -0.246                  | 0.792  | 0.288   |
| Happiness (0 to 5 Likert)           | Leave        | 8626  | 0.141           | 0.051                   | 0.232  | 0.004   |
|                                     | Stay         | 8626  | -0.189          | -0.298                  | -0.079 | 0.002   |
| Alcohol consumption (1 low, 5 high) | Leave        | 22123 | 0.319           | 0.086                   | 0.553  | 0.009   |
|                                     | Stay         | 22123 | -0.380          | -0.639                  | -0.121 | 0.006   |
| Hours watching television           | Leave        | 21206 | 0.093           | -0.115                  | 0.300  | 0.364   |
|                                     | Stay         | 21206 | -0.167          | -0.397                  | 0.062  | 0.146   |
| Moderate exercise (days/week)       | Leave        | 21330 | -0.002          | -0.329                  | 0.325  | 0.991   |
|                                     | Stay         | 21330 | 0.058           | -0.341                  | 0.458  | 0.765   |
| Vigorous exercise (days/week)       | Leave        | 21379 | 0.112           | -0.108                  | 0.333  | 0.303   |
|                                     | Stay         | 21379 | -0.102          | -0.373                  | 0.169  | 0.444   |

Notes: The main effect is the effect in those who had a predicted probability of staying of 0%. The largest possible prediction is 1, those who were highly likely to remain in school (the always takers). The effect on always takers is the sum of the two coefficients for any outcome. The effect on compliers who had zero probability of remaining in school is indicated by the "leave" coefficients.

**Table S4: Associations of outcome and the raising of the school leaving age in two negative control populations for MALES**

| Date of birth:                  | Negative control population 1                  |                 |                         |        |         | Negative control population 2                   |                 |                         |        |         |
|---------------------------------|------------------------------------------------|-----------------|-------------------------|--------|---------|-------------------------------------------------|-----------------|-------------------------|--------|---------|
|                                 | Sept 1955-August 1956 to Sept 1956-August 1957 |                 |                         |        |         | Sept 1957- August 1958 to Sept 1958-August 1959 |                 |                         |        |         |
|                                 | N                                              | Mean difference | 95% Confidence interval |        | P-value | N                                               | Mean difference | 95% Confidence interval |        | P-value |
| High blood pressure*            | 9,707                                          | -0.008          | -0.018                  | 0.003  | 0.13    | 9,320                                           | -0.022          | -0.032                  | -0.012 | <0.001  |
| Diabetes*                       | 9,790                                          | -0.002          | -0.008                  | 0.003  | 0.40    | 9,388                                           | -0.001          | -0.006                  | 0.004  | 0.61    |
| Stroke*                         | 9,834                                          | 0.000           | -0.002                  | 0.002  | 0.90    | 9,430                                           | -0.003          | -0.006                  | 0.000  | 0.08    |
| Heart attack*                   | 9,834                                          | -0.004          | -0.008                  | -0.001 | 0.03    | 9,430                                           | 0.003           | -0.001                  | 0.007  | 0.10    |
| Depression*                     | 9,526                                          | 0.007           | -0.005                  | 0.019  | 0.22    | 9,072                                           | -0.003          | -0.015                  | 0.009  | 0.60    |
| Cancer*                         | 9,834                                          | -0.004          | -0.012                  | 0.003  | 0.25    | 9,406                                           | -0.005          | -0.013                  | 0.002  | 0.17    |
| Died*                           | 9,852                                          | 0.002           | -0.002                  | 0.005  | 0.35    | 9,439                                           | -0.002          | -0.005                  | 0.001  | 0.23    |
| Ex-smoker*                      | 9,827                                          | -0.011          | -0.031                  | 0.009  | 0.27    | 9,425                                           | 0.001           | -0.018                  | 0.021  | 0.88    |
| Current smoker*                 | 9,827                                          | 0.000           | -0.012                  | 0.012  | 0.99    | 9,425                                           | 0.004           | -0.010                  | 0.018  | 0.57    |
| Income over £100k*              | 9,047                                          | -0.004          | -0.013                  | 0.005  | 0.35    | 8,628                                           | -0.001          | -0.009                  | 0.008  | 0.88    |
| Income over £52k*               | 9,047                                          | -0.003          | -0.019                  | 0.013  | 0.70    | 8,628                                           | -0.007          | -0.023                  | 0.008  | 0.35    |
| Income over £31k*               | 9,047                                          | -0.007          | -0.018                  | 0.005  | 0.23    | 8,628                                           | -0.014          | -0.023                  | -0.004 | 0.006   |
| Income over £18k*               | 9,047                                          | -0.003          | -0.014                  | 0.007  | 0.52    | 8,628                                           | -0.008          | -0.017                  | 0.001  | 0.07    |
| Grip strength (kg)              | 9,773                                          | -0.158          | -0.446                  | 0.129  | 0.27    | 9,368                                           | 0.058           | -0.323                  | 0.440  | 0.75    |
| Arterial Stiffness              | 3,746                                          | -0.229          | -0.407                  | -0.051 | 0.01    | 3,564                                           | -0.168          | -0.318                  | -0.017 | 0.03    |
| Height (cm)                     | 9,820                                          | 0.058           | -0.151                  | 0.268  | 0.57    | 9,405                                           | 0.158           | 0.040                   | 0.276  | 0.01    |
| BMI (kg/m <sup>2</sup> )        | 9,804                                          | -0.139          | -0.288                  | 0.011  | 0.07    | 9,399                                           | -0.012          | -0.157                  | 0.133  | 0.86    |
| Diastolic blood pressure (mmHg) | 9,550                                          | -0.155          | -0.387                  | 0.078  | 0.18    | 9,144                                           | 0.006           | -0.206                  | 0.217  | 0.95    |
| Systolic blood pressure (mmHg)  | 9,549                                          | -0.715          | -1.186                  | -0.244 | 0.005   | 9,144                                           | -0.125          | -0.433                  | 0.184  | 0.41    |
| Intelligence (0 to 13)          | 3,710                                          | -0.063          | -0.148                  | 0.021  | 0.14    | 3,542                                           | -0.009          | -0.150                  | 0.132  | 0.90    |
| Happiness (0 to 5 Likert)       | 3,757                                          | -0.026          | -0.055                  | 0.003  | 0.08    | 3,574                                           | -0.012          | -0.043                  | 0.019  | 0.43    |
| Alcohol consumption             | 9,846                                          | -0.010          | -0.042                  | 0.022  | 0.50    | 9,430                                           | -0.060          | -0.095                  | -0.024 | 0.002   |
| Hours watching TV               | 9,481                                          | 0.037           | -0.014                  | 0.088  | 0.15    | 9,067                                           | -0.047          | -0.109                  | 0.015  | 0.13    |
| Moderate exercise (days/wk)     | 9,574                                          | 0.025           | -0.027                  | 0.077  | 0.33    | 9,179                                           | -0.128          | -0.203                  | -0.054 | 0.002   |
| Vigorous exercise (days/wk)     | 9,554                                          | 0.037           | -0.023                  | 0.097  | 0.22    | 9,172                                           | 0.038           | -0.010                  | 0.087  | 0.12    |

Notes: \* denotes risk differences. Estimated using robust linear regression, with standard errors clustered by year and month of birth. All estimates adjust for month of birth and sex.



**Table S5: Associations of outcomes and the raising of the school leaving age in two negative control populations for FEMALES.**

| Date of birth:                  | Negative control population 1                  |                 |                         |        |         | Negative control population 2                   |                 |                         |        |         |
|---------------------------------|------------------------------------------------|-----------------|-------------------------|--------|---------|-------------------------------------------------|-----------------|-------------------------|--------|---------|
|                                 | Sept 1955-August 1956 to Sept 1956-August 1957 |                 |                         |        |         | Sept 1957- August 1958 to Sept 1958-August 1959 |                 |                         |        |         |
|                                 | N                                              | Mean difference | 95% Confidence interval |        | P-value | N                                               | Mean difference | 95% Confidence interval |        | P-value |
| High blood pressure*            | 12,697                                         | -0.012          | -0.022                  | -0.002 | 0.02    | 11,833                                          | -0.009          | -0.019                  | 0.001  | 0.07    |
| Diabetes*                       | 12,895                                         | 0.001           | -0.002                  | 0.004  | 0.72    | 11,988                                          | -0.002          | -0.005                  | 0.001  | 0.14    |
| Stroke*                         | 12,922                                         | 0.001           | -0.001                  | 0.002  | 0.33    | 12,022                                          | 0.001           | -0.002                  | 0.003  | 0.63    |
| Heart attack*                   | 12,922                                         | 0.000           | -0.002                  | 0.001  | 0.44    | 12,022                                          | 0.001           | -0.001                  | 0.002  | 0.45    |
| Depression*                     | 12,132                                         | 0.015           | 0.005                   | 0.025  | 0.007   | 11,356                                          | -0.004          | -0.014                  | 0.005  | 0.37    |
| Cancer*                         | 12,836                                         | -0.006          | -0.013                  | 0.001  | 0.09    | 11,928                                          | -0.008          | -0.015                  | 0.000  | 0.05    |
| Died*                           | 12,937                                         | 0.002           | -0.001                  | 0.004  | 0.14    | 12,037                                          | 0.003           | 0.001                   | 0.004  | <0.001  |
| Ex-smoker*                      | 12,901                                         | -0.011          | -0.019                  | -0.003 | 0.008   | 12,011                                          | -0.003          | -0.016                  | 0.010  | 0.68    |
| Current smoker*                 | 12,901                                         | 0.000           | -0.009                  | 0.009  | 0.99    | 12,011                                          | 0.004           | -0.002                  | 0.010  | 0.22    |
| Income over £100k*              | 11,384                                         | 0.010           | 0.002                   | 0.019  | 0.02    | 10,738                                          | 0.006           | 0.000                   | 0.013  | 0.06    |
| Income over £52k*               | 11,384                                         | 0.010           | -0.004                  | 0.024  | 0.15    | 10,738                                          | 0.014           | 0.001                   | 0.027  | 0.03    |
| Income over £31k*               | 11,384                                         | 0.007           | -0.007                  | 0.020  | 0.30    | 10,738                                          | 0.017           | 0.007                   | 0.027  | 0.002   |
| Income over £18k*               | 11,384                                         | 0.014           | 0.009                   | 0.020  | <0.001  | 10,738                                          | 0.009           | -0.001                  | 0.019  | 0.09    |
| Grip strength (kg)              | 12,862                                         | 0.355           | 0.188                   | 0.523  | <0.001  | 11,968                                          | 0.187           | 0.072                   | 0.301  | 0.003   |
| Arterial Stiffness              | 5,018                                          | -0.248          | -0.356                  | -0.140 | <0.001  | 4,589                                           | -0.204          | -0.313                  | -0.095 | <0.001  |
| Height (cm)                     | 12,907                                         | 0.101           | -0.054                  | 0.257  | 0.19    | 12,017                                          | 0.159           | 0.008                   | 0.310  | 0.04    |
| BMI (kg/m <sup>2</sup> )        | 12,889                                         | 0.049           | -0.071                  | 0.168  | 0.41    | 12,012                                          | -0.069          | -0.196                  | 0.058  | 0.27    |
| Diastolic blood pressure (mmHg) | 12,551                                         | -0.390          | -0.756                  | -0.023 | 0.04    | 11,685                                          | -0.565          | -0.887                  | -0.243 | 0.001   |
| Systolic blood pressure (mmHg)  | 12,550                                         | -1.047          | -1.586                  | -0.508 | <0.001  | 11,685                                          | -1.044          | -1.448                  | -0.640 | <0.001  |
| Intelligence (0 to 13)          | 5,045                                          | -0.086          | -0.167                  | -0.004 | 0.04    | 4,621                                           | -0.102          | -0.159                  | -0.045 | 0.001   |
| Happiness (0 to 5 Likert)       | 5,090                                          | 0.033           | 0.000                   | 0.066  | 0.05    | 4,653                                           | -0.004          | -0.024                  | 0.015  | 0.66    |
| Alcohol consumption             | 12,932                                         | -0.013          | -0.054                  | 0.028  | 0.53    | 12,031                                          | -0.006          | -0.043                  | 0.031  | 0.74    |
| Hours watching TV               | 12,387                                         | -0.028          | -0.075                  | 0.019  | 0.23    | 11,492                                          | -0.060          | -0.100                  | -0.021 | 0.004   |
| Moderate exercise (days/wk)     | 12,384                                         | 0.014           | -0.059                  | 0.086  | 0.70    | 11,550                                          | 0.028           | -0.053                  | 0.108  | 0.48    |
| Vigorous exercise (days/wk)     | 12,440                                         | 0.082           | 0.033                   | 0.132  | 0.002   | 11,658                                          | 0.089           | 0.036                   | 0.141  | 0.002   |

Notes: \* denotes risk differences. Estimated using robust linear regression, with standard errors clustered by year and month of birth.

**Table S6: The effects of leaving school after age 15, instrumental variable regression (left) and conventional regression (right), MALES**

|                                 | N     | Instrumental variable regression |                         |        |        |         | Conventional linear regression |            |                         |        |
|---------------------------------|-------|----------------------------------|-------------------------|--------|--------|---------|--------------------------------|------------|-------------------------|--------|
|                                 |       | Mean/risk                        | 95% Confidence interval |        | P-     | Hausman | Partial                        | Mean/risk  | 95% Confidence interval |        |
|                                 |       | difference                       | Lower                   | Upper  | value  | p-value | F-stat                         | difference | Lower                   | Upper  |
| High blood pressure*            | 9,554 | -0.100                           | -0.149                  | -0.051 | <0.001 | 0.08    | 609                            | -0.057     | -0.092                  | -0.022 |
| Diabetes*                       | 9,650 | -0.057                           | -0.086                  | -0.029 | <0.001 | 0.23    | 622                            | -0.035     | -0.061                  | -0.008 |
| Stroke*                         | 9,684 | -0.009                           | -0.025                  | 0.008  | 0.30   | 0.69    | 628                            | -0.005     | -0.013                  | 0.003  |
| Heart attack*                   | 9,684 | -0.005                           | -0.017                  | 0.006  | 0.35   | 0.07    | 628                            | -0.018     | -0.032                  | -0.005 |
| Depression*                     | 9,376 | -0.051                           | -0.141                  | 0.038  | 0.26   | 0.11    | 591                            | -0.006     | -0.015                  | 0.004  |
| Cancer*                         | 9,681 | -0.034                           | -0.068                  | -0.001 | 0.05   | 0.13    | 628                            | -0.014     | -0.022                  | -0.005 |
| Died*                           | 9,699 | -0.044                           | -0.063                  | -0.025 | <0.001 | 0.008   | 629                            | 0.850      | -0.053                  | 1.753  |
| Ex-smoker*                      | 9,681 | -0.065                           | -0.194                  | 0.063  | 0.32   | 0.03    | 625                            | -0.222     | -0.250                  | -0.194 |
| Current smoker*                 | 9,681 | 0.012                            | -0.034                  | 0.058  | 0.60   | <0.001  | 625                            | -0.171     | -0.195                  | -0.146 |
| Income over £100k*              | 8,904 | 0.002                            | -0.042                  | 0.046  | 0.93   | 0.003   | 519                            | 0.090      | 0.080                   | 0.100  |
| Income over £52k*               | 8,904 | 0.063                            | -0.050                  | 0.177  | 0.27   | 0.007   | 519                            | 0.276      | 0.243                   | 0.309  |
| Income over £31k*               | 8,904 | 0.256                            | 0.206                   | 0.307  | <0.001 | 0.19    | 519                            | 0.301      | 0.253                   | 0.349  |
| Income over £18k*               | 8,904 | 0.086                            | 0.024                   | 0.148  | 0.007  | 0.13    | 519                            | 0.146      | 0.114                   | 0.178  |
| Grip strength (kg)              | 9,618 | 3.502                            | 2.326                   | 4.679  | <0.001 | <0.001  | 613                            | -1.024     | -1.459                  | -0.590 |
| Arterial Stiffness              | 3,674 | -0.852                           | -1.786                  | 0.081  | 0.07   | 0.72    | 208                            | 1.789      | 1.442                   | 2.137  |
| Height (cm)                     | 9,666 | 1.114                            | -0.112                  | 2.339  | 0.07   | 0.33    | 625                            | -0.979     | -1.375                  | -0.584 |
| BMI (kg/m <sup>2</sup> )        | 9,656 | -0.548                           | -1.490                  | 0.394  | 0.25   | 0.37    | 624                            | -0.667     | -1.749                  | 0.415  |
| Diastolic blood pressure (mmHg) | 9,405 | -0.693                           | -2.555                  | 1.168  | 0.47   | 0.98    | 603                            | -0.853     | -2.417                  | 0.711  |
| Systolic blood pressure (mmHg)  | 9,404 | -2.414                           | -4.976                  | 0.149  | 0.06   | 0.24    | 602                            | 1.790      | 1.408                   | 2.172  |
| Intelligence (0 to 13)          | 3,644 | -0.080                           | -0.871                  | 0.710  | 0.84   | 0.001   | 204                            | -0.026     | -0.146                  | 0.095  |
| Happiness (0 to 5 Likert)       | 3,687 | -0.156                           | -0.394                  | 0.082  | 0.20   | 0.31    | 209                            | 0.022      | -0.005                  | 0.049  |
| Alcohol consumption             | 9,692 | 0.106                            | -0.088                  | 0.300  | 0.29   | 0.15    | 627                            | 0.292      | 0.149                   | 0.435  |
| Hours watching TV               | 9,334 | -0.490                           | -0.763                  | -0.218 | <0.001 | 0.03    | 599                            | -0.881     | -0.980                  | -0.782 |
| Moderate exercise (days/wk)     | 9,421 | 0.584                            | 0.180                   | 0.989  | 0.005  | <0.001  | 579                            | -0.670     | -0.897                  | -0.443 |
| Vigorous exercise (days/wk)     | 9,395 | 0.313                            | -0.051                  | 0.677  | 0.09   | 0.02    | 565                            | -0.276     | -0.427                  | -0.126 |

Notes: \* denotes risk differences. Estimated using robust linear regression, with standard errors clustered by year and month of birth. All estimates adjust for month of birth and sex.

**Table S7: The effects of leaving school after age 15, instrumental variable regression (left) and conventional regression (right), FEMALE**

|                                 | N      | Instrumental variable regression |                         |        |         |                 | Conventional linear regression |                      |                         |        |
|---------------------------------|--------|----------------------------------|-------------------------|--------|---------|-----------------|--------------------------------|----------------------|-------------------------|--------|
|                                 |        | Mean/risk difference             | 95% Confidence interval |        | P-value | Hausman p-value | Partial F-stat                 | Mean/risk difference | 95% Confidence interval |        |
|                                 |        |                                  | Lower                   | Upper  |         |                 |                                |                      | Lower                   | Upper  |
| High blood pressure*            | 12,214 | -0.084                           | -0.176                  | 0.007  | 0.07    | 0.29            | 700                            | -0.057               | -0.080                  | -0.035 |
| Diabetes*                       | 12,399 | -0.036                           | -0.057                  | -0.016 | <0.001  | 0.02            | 696                            | -0.007               | -0.015                  | 0.000  |
| Stroke*                         | 12,426 | -0.025                           | -0.036                  | -0.014 | <0.001  | 0.02            | 700                            | -0.007               | -0.013                  | 0.000  |
| Heart attack*                   | 12,426 | -0.017                           | -0.024                  | -0.009 | <0.001  | 0.02            | 700                            | -0.005               | -0.010                  | 0.000  |
| Depression*                     | 11,709 | -0.027                           | -0.104                  | 0.050  | 0.49    | 0.09            | 688                            | -0.006               | -0.028                  | 0.016  |
| Cancer*                         | 12,330 | -0.022                           | -0.075                  | 0.030  | 0.41    | 0.55            | 702                            | -0.004               | -0.010                  | 0.003  |
| Died*                           | 12,439 | -0.016                           | -0.035                  | 0.003  | 0.10    | 0.16            | 689                            | 1.501                | 1.258                   | 1.744  |
| Ex-smoker*                      | 12,405 | -0.031                           | -0.086                  | 0.025  | 0.28    | <0.001          | 702                            | -0.192               | -0.225                  | -0.159 |
| Current smoker*                 | 12,405 | 0.025                            | -0.019                  | 0.069  | 0.27    | <0.001          | 702                            | -0.116               | -0.140                  | -0.093 |
| Income over £100k*              | 11,017 | -0.025                           | -0.097                  | 0.048  | 0.51    | 0.03            | 592                            | 0.070                | 0.058                   | 0.082  |
| Income over £52k*               | 11,017 | 0.070                            | -0.011                  | 0.150  | 0.09    | <0.001          | 592                            | 0.240                | 0.221                   | 0.259  |
| Income over £31k*               | 11,017 | 0.133                            | 0.082                   | 0.184  | <0.001  | <0.001          | 592                            | 0.290                | 0.253                   | 0.328  |
| Income over £18k*               | 11,017 | 0.030                            | -0.028                  | 0.088  | 0.31    | <0.001          | 592                            | 0.196                | 0.166                   | 0.227  |
| Grip strength (kg)              | 12,371 | 2.411                            | 1.514                   | 3.309  | <0.001  | 0.07            | 260                            | -0.550               | -0.753                  | -0.347 |
| Arterial Stiffness              | 4,863  | 0.003                            | -0.895                  | 0.900  | 1.00    | 0.24            | 699                            | 1.756                | 1.415                   | 2.098  |
| Height (cm)                     | 12,411 | 0.054                            | -0.598                  | 0.707  | 0.87    | <0.001          | 701                            | -1.425               | -1.762                  | -1.088 |
| BMI (kg/m <sup>2</sup> )        | 12,399 | -1.041                           | -2.072                  | -0.009 | 0.05    | 0.47            | 672                            | -1.054               | -1.577                  | -0.531 |
| Diastolic blood pressure (mmHg) | 12,089 | 1.009                            | -1.325                  | 3.342  | 0.40    | 0.09            | 672                            | -2.345               | -3.373                  | -1.317 |
| Systolic blood pressure (mmHg)  | 12,088 | -3.450                           | -6.604                  | -0.296 | 0.03    | 0.49            | 264                            | 1.546                | 1.340                   | 1.752  |
| Intelligence (0 to 13)          | 4,896  | -0.080                           | -0.645                  | 0.484  | 0.78    | <0.001          | 270                            | 0.031                | -0.025                  | 0.087  |
| Happiness (0 to 5 Likert)       | 4,939  | -0.122                           | -0.302                  | 0.057  | 0.18    | 0.13            | 631                            | 0.038                | 0.021                   | 0.055  |
| Alcohol consumption             | 12,431 | -0.079                           | -0.388                  | 0.229  | 0.61    | 0.02            | 702                            | 0.328                | 0.225                   | 0.431  |
| Hours watching TV               | 11,872 | -0.282                           | -0.533                  | -0.031 | 0.03    | <0.001          | 693                            | -0.796               | -0.922                  | -0.669 |
| Moderate exercise (days/wk)     | 11,909 | 0.103                            | -0.379                  | 0.585  | 0.67    | 0.09            | 631                            | -0.317               | -0.488                  | -0.147 |
| Vigorous exercise (days/wk)     | 11,984 | 0.065                            | -0.227                  | 0.358  | 0.66    | 0.62            | 640                            | -0.007               | -0.134                  | 0.119  |

Notes: \* denotes risk differences. Estimated using robust linear regression, with standard errors clustered by year and month of birth. All estimates adjust for month of birth and sex.

**Table S8: The effects of leaving school after age 15, instrumental variable regression (left) and conventional regression (right), Clark and Royer (2013) specification 47 month bandwidth, MALES and FEMALES.**

|                                 | N       | Instrumental variable regression |                         |        |         |                 | Conventional linear regression |                      |                         |        |
|---------------------------------|---------|----------------------------------|-------------------------|--------|---------|-----------------|--------------------------------|----------------------|-------------------------|--------|
|                                 |         | Mean/risk difference             | 95% Confidence interval |        | P-value | Hausman p-value | Partial F-stat                 | Mean/risk difference | 95% Confidence interval |        |
|                                 |         |                                  | Lower                   | Upper  |         |                 |                                |                      | Lower                   | Upper  |
| High blood pressure*            | 288,579 | -0.069                           | -0.235                  | 0.096  | 0.41    | 0.75            | 75                             | -0.043               | -0.047                  | -0.039 |
| Diabetes*                       | 295,606 | 0.073                            | 0.001                   | 0.146  | 0.05    | 0.04            | 81                             | -0.018               | -0.020                  | -0.016 |
| Stroke*                         | 296,729 | 0.062                            | 0.015                   | 0.109  | 0.009   | 0.02            | 80                             | -0.009               | -0.011                  | -0.008 |
| Heart attack*                   | 296,729 | 0.172                            | 0.117                   | 0.226  | <0.001  | 1.2E-4          | 80                             | -0.018               | -0.020                  | -0.016 |
| Depression*                     | 281,588 | -2.385                           | -3.252                  | -1.519 | <0.001  | 1.6E-5          | 66                             | 0.032                | 0.029                   | 0.036  |
| Cancer*                         | 296,144 | 0.237                            | 0.124                   | 0.350  | <0.001  | 0.001           | 79                             | 0.002                | -0.001                  | 0.006  |
| Died*                           | 297,226 | 0.147                            | 0.090                   | 0.205  | <0.001  | 0.001           | 80                             | -0.007               | -0.008                  | -0.006 |
| Ex-smoker*                      | 296,106 | -1.148                           | -1.489                  | -0.808 | <0.001  | 2.4E-5          | 78                             | -0.102               | -0.107                  | -0.097 |
| Current smoker*                 | 296,106 | 0.120                            | -0.029                  | 0.268  | 0.11    | 0.04            | 78                             | -0.054               | -0.057                  | -0.050 |
| Income over £100k*              | 251,968 | -1.529                           | -1.889                  | -1.170 | <0.001  | 3.3E-6          | 64                             | 0.285                | 0.275                   | 0.294  |
| Income over £52k*               | 251,968 | -1.432                           | -1.837                  | -1.027 | <0.001  | 2.0E-6          | 64                             | 0.270                | 0.265                   | 0.275  |
| Income over £31k*               | 251,968 | -0.675                           | -1.017                  | -0.333 | <0.001  | 5.5E-5          | 64                             | 0.151                | 0.144                   | 0.158  |
| Income over £18k*               | 251,968 | -0.023                           | -0.159                  | 0.113  | 0.74    | 0.42            | 64                             | 0.033                | 0.031                   | 0.035  |
| Grip strength (kg)              | 294,729 | 3.140                            | -1.928                  | 8.208  | 0.22    | 0.44            | 80                             | 1.214                | 1.150                   | 1.278  |
| Arterial Stiffness              | 116,704 | -7.251                           | -10.474                 | -4.028 | <0.001  | 4.2E-4          | 23                             | -0.211               | -0.266                  | -0.156 |
| Height (cm)                     | 296,227 | -5.085                           | -8.861                  | -1.309 | 0.008   | 0.007           | 80                             | 2.100                | 2.041                   | 2.159  |
| BMI (kg/m <sup>2</sup> )        | 295,900 | -1.702                           | -3.465                  | 0.060  | 0.06    | 0.56            | 80                             | -1.174               | -1.219                  | -1.129 |
| Diastolic blood pressure (mmHg) | 288,385 | -10.775                          | -16.293                 | -5.256 | <0.001  | 0.003           | 75                             | -0.322               | -0.414                  | -0.229 |
| Systolic blood pressure (mmHg)  | 288,383 | -7.456                           | -14.956                 | 0.043  | 0.05    | 0.14            | 75                             | -1.432               | -1.605                  | -1.259 |
| Intelligence (0 to 13)          | 115,497 | -13.829                          | -18.127                 | -9.531 | <0.001  | 4.6E-7          | 27                             | 1.761                | 1.731                   | 1.790  |
| Happiness (0 to 5 Likert)       | 117,859 | -0.562                           | -1.249                  | 0.124  | 0.11    | 0.11            | 25                             | -0.011               | -0.022                  | -0.001 |
| Alcohol consumption             | 297,051 | -1.473                           | -2.357                  | -0.590 | 0.001   | 0.001           | 80                             | 0.476                | 0.463                   | 0.489  |
| Hours watching TV               | 286,794 | 1.299                            | 0.580                   | 2.018  | <0.001  | 1.4E-4          | 85                             | -0.833               | -0.849                  | -0.816 |
| Moderate exercise (days/wk)     | 282,844 | 1.823                            | 0.531                   | 3.115  | 0.006   | 0.002           | 68                             | -0.270               | -0.295                  | -0.246 |
| Vigorous exercise (days/wk)     | 282,863 | 2.413                            | 1.097                   | 3.729  | <0.001  | 1.6E-4          | 69                             | -0.123               | -0.142                  | -0.103 |

Notes: \* denotes risk differences. Estimated using robust linear regression, with standard errors clustered by year and month of birth. All estimates adjust for month of birth, sex, and linear time-trend.

**Table S9: The effects of leaving school after age 15, instrumental variable regression (left) and conventional regression (right), Clark and Royer (2013) specification 47 month bandwidth, MALES.**

|                                 | N       | Instrumental variable regression |                         |        |         |                 | Conventional linear regression |                      |                         |        |
|---------------------------------|---------|----------------------------------|-------------------------|--------|---------|-----------------|--------------------------------|----------------------|-------------------------|--------|
|                                 |         | Mean/risk difference             | 95% Confidence interval |        | P-value | Hausman p-value | Partial F-stat                 | Mean/risk difference | 95% Confidence interval |        |
|                                 |         |                                  | Lower                   | Upper  |         |                 |                                |                      | Lower                   | Upper  |
| High blood pressure*            | 135,775 | -0.376                           | -0.710                  | -0.043 | 0.03    | 0.04            | 23                             | -0.045               | -0.051                  | -0.038 |
| Diabetes*                       | 137,554 | 0.028                            | -0.113                  | 0.170  | 0.69    | 0.51            | 24                             | -0.020               | -0.024                  | -0.017 |
| Stroke*                         | 138,282 | 0.065                            | -0.019                  | 0.149  | 0.13    | 0.10            | 24                             | -0.011               | -0.013                  | -0.008 |
| Heart attack*                   | 138,282 | 0.231                            | 0.097                   | 0.364  | <0.001  | 0.003           | 24                             | -0.030               | -0.033                  | -0.027 |
| Depression*                     | 133,061 | -2.570                           | -3.596                  | -1.545 | <0.001  | 1.0E-4          | 20                             | 0.028                | 0.024                   | 0.033  |
| Cancer*                         | 138,320 | 0.542                            | 0.328                   | 0.756  | <0.001  | 1.4E-4          | 24                             | 0.003                | -0.002                  | 0.007  |
| Died*                           | 138,507 | 0.318                            | 0.182                   | 0.454  | <0.001  | 5.5E-5          | 24                             | -0.012               | -0.014                  | -0.010 |
| Ex-smoker*                      | 137,960 | -1.191                           | -1.797                  | -0.586 | <0.001  | 0.004           | 23                             | -0.107               | -0.114                  | -0.101 |
| Current smoker*                 | 137,960 | 0.080                            | -0.237                  | 0.397  | 0.62    | 0.43            | 23                             | -0.053               | -0.058                  | -0.048 |
| Income over £100k*              | 123,137 | -1.832                           | -2.491                  | -1.173 | <0.001  | 5.7E-7          | 22                             | 0.291                | 0.278                   | 0.304  |
| Income over £52k*               | 123,137 | -2.545                           | -3.449                  | -1.640 | <0.001  | 6.2E-7          | 22                             | 0.303                | 0.296                   | 0.310  |
| Income over £31k*               | 123,137 | -1.577                           | -2.293                  | -0.862 | <0.001  | 3.8E-5          | 22                             | 0.181                | 0.173                   | 0.190  |
| Income over £18k*               | 123,137 | -0.277                           | -0.533                  | -0.021 | 0.03    | 0.01            | 22                             | 0.042                | 0.039                   | 0.045  |
| Grip strength (kg)              | 137,365 | -8.106                           | -17.672                 | 1.460  | 0.10    | 0.09            | 25                             | 0.973                | 0.862                   | 1.084  |
| Arterial Stiffness              | 55,196  | -13.426                          | -23.482                 | -3.369 | 0.009   | 0.001           | 6                              | -0.218               | -0.317                  | -0.118 |
| Height (cm)                     | 137,989 | -10.128                          | -15.884                 | -4.372 | <0.001  | 6.3E-4          | 25                             | 2.279                | 2.194                   | 2.365  |
| BMI (kg/m <sup>2</sup> )        | 137,835 | -2.824                           | -6.485                  | 0.838  | 0.13    | 0.36            | 25                             | -1.056               | -1.114                  | -0.998 |
| Diastolic blood pressure (mmHg) | 134,450 | -12.780                          | -24.648                 | -0.913 | 0.03    | 0.05            | 24                             | -0.315               | -0.443                  | -0.187 |
| Systolic blood pressure (mmHg)  | 134,449 | -11.376                          | -26.293                 | 3.542  | 0.14    | 0.18            | 24                             | -1.329               | -1.566                  | -1.092 |
| Intelligence (0 to 13)          | 54,397  | -21.791                          | -34.286                 | -9.297 | <0.001  | 1.2E-7          | 7                              | 1.858                | 1.818                   | 1.899  |
| Happiness (0 to 5 Likert)       | 55,574  | -0.954                           | -2.371                  | 0.464  | 0.19    | 0.19            | 6                              | -0.025               | -0.039                  | -0.010 |
| Alcohol consumption             | 138,428 | -3.425                           | -4.992                  | -1.857 | <0.001  | 1.9E-4          | 24                             | 0.407                | 0.388                   | 0.425  |
| Hours watching TV               | 133,969 | 3.613                            | 1.935                   | 5.292  | <0.001  | 1.8E-5          | 25                             | -0.833               | -0.857                  | -0.808 |
| Moderate exercise (days/wk)     | 133,519 | 4.371                            | 1.663                   | 7.078  | 0.002   | 3.3E-4          | 23                             | -0.476               | -0.511                  | -0.441 |
| Vigorous exercise (days/wk)     | 133,008 | 3.844                            | 1.178                   | 6.510  | 0.005   | 0.008           | 22                             | -0.243               | -0.271                  | -0.215 |

Notes: \* denotes risk differences. Estimated using robust linear regression, with standard errors clustered by year and month of birth. All estimates adjust for month of birth, sex, and linear time-trend.

**Table S10: The effects of leaving school after age 15, instrumental variable regression (left) and conventional regression (right), Clark and Royer (2013) specification 47 month bandwidth, FEMALES.**

|                                 | N       | Instrumental variable regression |                         |        |        |         | Conventional linear regression |            |                         |        |
|---------------------------------|---------|----------------------------------|-------------------------|--------|--------|---------|--------------------------------|------------|-------------------------|--------|
|                                 |         | Mean/risk                        | 95% Confidence interval |        | P-     | Hausman | Partial                        | Mean/risk  | 95% Confidence interval |        |
|                                 |         | difference                       | Lower                   | Upper  | value  | p-value | F-stat                         | difference | Lower                   | Upper  |
| High blood pressure*            | 152,804 | 0.088                            | -0.065                  | 0.242  | 0.26   | 0.12    | 54                             | -0.041     | -0.046                  | -0.036 |
| Diabetes*                       | 158,052 | 0.074                            | -0.002                  | 0.149  | 0.06   | 0.06    | 58                             | -0.016     | -0.018                  | -0.013 |
| Stroke*                         | 158,447 | 0.051                            | 0.000                   | 0.101  | 0.05   | 0.06    | 58                             | -0.008     | -0.010                  | -0.007 |
| Heart attack*                   | 158,447 | 0.104                            | 0.066                   | 0.142  | <0.001 | 4.6E-5  | 58                             | -0.008     | -0.009                  | -0.006 |
| Depression*                     | 148,527 | -2.326                           | -3.283                  | -1.368 | <0.001 | 1.1E-5  | 47                             | 0.036      | 0.032                   | 0.040  |
| Cancer*                         | 157,824 | 0.025                            | -0.105                  | 0.156  | 0.70   | 0.73    | 56                             | 0.002      | -0.002                  | 0.007  |
| Died*                           | 158,719 | 0.031                            | -0.029                  | 0.090  | 0.31   | 0.32    | 57                             | -0.003     | -0.004                  | -0.001 |
| Ex-smoker*                      | 158,146 | -1.232                           | -1.602                  | -0.862 | <0.001 | 1.6E-6  | 57                             | -0.097     | -0.104                  | -0.091 |
| Current smoker*                 | 158,146 | 0.150                            | 0.004                   | 0.297  | 0.04   | 0.01    | 57                             | -0.054     | -0.058                  | -0.050 |
| Income over £100k*              | 128,831 | -1.410                           | -1.818                  | -1.002 | <0.001 | 3.9E-5  | 45                             | 0.279      | 0.271                   | 0.287  |
| Income over £52k*               | 128,831 | -0.757                           | -1.131                  | -0.383 | <0.001 | 1.6E-4  | 45                             | 0.236      | 0.229                   | 0.244  |
| Income over £31k*               | 128,831 | -0.069                           | -0.402                  | 0.265  | 0.69   | 0.25    | 45                             | 0.120      | 0.112                   | 0.128  |
| Income over £18k*               | 128,831 | 0.150                            | 0.015                   | 0.285  | 0.03   | 0.07    | 45                             | 0.024      | 0.022                   | 0.027  |
| Grip strength (kg)              | 157,364 | 10.449                           | 6.021                   | 14.877 | <0.001 | 4.0E-5  | 57                             | 1.423      | 1.354                   | 1.492  |
| Arterial Stiffness              | 61,508  | -3.879                           | -6.866                  | -0.892 | 0.01   | 0.03    | 18                             | -0.205     | -0.272                  | -0.138 |
| Height (cm)                     | 158,238 | -2.218                           | -6.422                  | 1.987  | 0.30   | 0.10    | 57                             | 1.940      | 1.863                   | 2.017  |
| BMI (kg/m <sup>2</sup> )        | 158,065 | -0.590                           | -3.229                  | 2.049  | 0.66   | 0.61    | 56                             | -1.277     | -1.339                  | -1.215 |
| Diastolic blood pressure (mmHg) | 153,935 | -8.062                           | -12.685                 | -3.438 | <0.001 | 0.01    | 53                             | -0.327     | -0.448                  | -0.205 |
| Systolic blood pressure (mmHg)  | 153,934 | 0.539                            | -8.079                  | 9.158  | 0.90   | 0.64    | 53                             | -1.500     | -1.735                  | -1.264 |
| Intelligence (0 to 13)          | 61,100  | -9.694                           | -13.101                 | -6.287 | <0.001 | 1.4E-5  | 21                             | 1.671      | 1.634                   | 1.708  |
| Happiness (0 to 5 Likert)       | 62,285  | -0.434                           | -1.203                  | 0.334  | 0.27   | 0.24    | 20                             | 0.000      | -0.013                  | 0.014  |
| Alcohol consumption             | 158,623 | -0.585                           | -1.527                  | 0.357  | 0.22   | 0.03    | 58                             | 0.536      | 0.518                   | 0.554  |
| Hours watching TV               | 152,825 | 0.121                            | -0.995                  | 1.237  | 0.83   | 0.13    | 61                             | -0.832     | -0.852                  | -0.811 |
| Moderate exercise (days/wk)     | 149,325 | 0.376                            | -0.998                  | 1.751  | 0.59   | 0.51    | 47                             | -0.082     | -0.111                  | -0.053 |
| Vigorous exercise (days/wk)     | 149,855 | 1.753                            | 0.323                   | 3.183  | 0.02   | 0.004   | 49                             | -0.013     | -0.038                  | 0.012  |

Notes: \* denotes risk differences. Estimated using robust linear regression, with standard errors clustered by year and month of birth. All estimates adjust for month of birth, sex, and linear time-trend.
